# Supplementary material for: Unimolecular decomposition of 2,5-dimethylfuran: a theoretical chemical kinetic study
Source: Royal Society of Chemistry journal article supplement (doi:10.1039/c2cp41927k), 2012-11-08
Supplement: c2cp41927k.pdf [file c2cp41927k.pdf]

## **Unimolecular Decomposition of 2,5-dimethylfuran:**

### **a Theoretical Chemical Kinetic Study**

Baptiste Sirjean,<sup>1,\*</sup> René Fournet<sup>1</sup>

<sup>1</sup> *Laboratoire Réactions et Génie des Procédés, Université de Lorraine, CNRS,  
BP 20451, 1 rue Grandville, 54001 Nancy, France*

## **Supporting information**

\*Authors to whom correspondence should be addressed:

Baptiste Sirjean – baptiste.sirjean@univ-lorraine.fr  
Phone: (33) 383175202

Manuscript submitted to *Physical Chemistry Chemical Physics*,

**Table S1: Geometries optimized at the B3LYP/cbsb7 level of theory unless specified otherwise. (Angstroms)**

| M1 |           |           | M4        |   |           |           |           |
|----|-----------|-----------|-----------|---|-----------|-----------|-----------|
| 6  | -1.108078 | -0.003479 | 0.000009  | 6 | 1.481529  | .197035   | -.010683  |
| 6  | -0.717983 | 1.298413  | -0.000073 | 6 | .385065   | -.824130  | -.059557  |
| 6  | 0.717983  | 1.298413  | 0.000059  | 6 | -.866008  | -.503171  | -.290045  |
| 6  | 1.108078  | -0.003479 | 0.000000  | 6 | -2.097437 | -.157448  | -.521073  |
| 8  | 0.000000  | -0.811533 | -0.000082 | 8 | 1.282929  | 1.380677  | -.174554  |
| 1  | -1.370778 | 2.157278  | -0.000106 | 1 | .656119   | -1.865039 | .102967   |
| 1  | 1.370778  | 2.157278  | 0.000130  | 6 | 2.868749  | -.357505  | .260276   |
| 6  | -2.430059 | -0.683482 | 0.000052  | 1 | 3.145169  | -1.084588 | -.510249  |
| 1  | -2.551859 | -1.319291 | -0.882798 | 1 | 3.590869  | .457172   | .273518   |
| 1  | -2.551816 | -1.319283 | 0.882916  | 1 | 2.887078  | -.883570  | 1.220362  |
| 1  | -3.229615 | 0.058716  | 0.000067  | 6 | -3.105558 | .225191   | .533887   |
| 6  | 2.430059  | -0.683482 | 0.000017  | 1 | -3.457081 | 1.248044  | .368278   |
| 1  | 2.551871  | -1.319248 | -0.882864 | 1 | -3.978971 | -.432816  | .489030   |
| 1  | 3.229615  | 0.058716  | 0.000082  | 1 | -2.676361 | .166346   | 1.534298  |
| 1  | 2.551804  | -1.319327 | 0.882850  | 1 | -2.428292 | -.130795  | -1.558599 |
| M2 |           |           | M5        |   |           |           |           |
| 6  | 1.096208  | -0.176264 | -0.000175 | 6 | -1.518729 | -0.039713 | 0.000021  |
| 6  | -0.015316 | -0.960168 | -0.000161 | 6 | -0.410026 | -1.029462 | 0.001979  |
| 6  | -1.156448 | -0.081027 | 0.000121  | 6 | 0.932202  | -0.885485 | 0.001305  |
| 6  | -0.639208 | 1.174576  | 0.000031  | 6 | 1.760747  | 0.308307  | -0.001522 |
| 8  | 0.728941  | 1.139505  | -0.000082 | 8 | -2.661671 | -0.461982 | -0.003381 |
| 1  | -0.030518 | -2.039658 | -0.000135 | 1 | -0.804305 | -2.040996 | 0.003436  |
| 6  | 2.555139  | -0.463427 | 0.000130  | 1 | 1.503771  | -1.812218 | 0.002900  |
| 1  | 3.043959  | -0.038435 | -0.882192 | 6 | -1.263754 | 1.457112  | 0.002402  |
| 1  | 3.043231  | -0.039238 | 0.883241  | 1 | -2.227018 | 1.965273  | 0.005347  |
| 1  | 2.723228  | -1.541205 | -0.000318 | 1 | -0.693368 | 1.758288  | 0.885374  |
| 1  | -1.083723 | 2.155887  | 0.000028  | 1 | -0.697998 | 1.761123  | -0.882680 |
| 6  | -2.602338 | -0.473006 | 0.000062  | 6 | 3.098815  | 0.246793  | -0.001066 |
| 1  | -2.853008 | -1.071790 | 0.881354  | 1 | 3.622916  | -0.703741 | 0.001572  |
| 1  | -3.250199 | 0.406336  | -0.000207 | 1 | 3.708387  | 1.142315  | -0.003276 |
| 1  | -2.852723 | -1.072042 | -0.881164 | 1 | 1.285456  | 1.280500  | -0.004341 |
| M3 |           |           | M6        |   |           |           |           |
| 6  | -1.141090 | -0.129102 | 0.139061  | 6 | -1.202968 | -0.048340 | -0.000005 |
| 6  | 0.009464  | 0.678641  | -0.395398 | 8 | -0.590753 | -1.270547 | -0.000080 |
| 6  | 1.030249  | 1.245364  | 0.573976  | 6 | 1.903800  | 0.227021  | 0.000004  |
| 6  | 1.427059  | 0.218516  | -0.086615 | 6 | 0.996251  | 1.178105  | -0.000067 |
| 8  | -1.035582 | -0.812405 | 1.136878  | 6 | -0.460145 | 1.072200  | 0.000012  |
| 1  | -0.190121 | 1.210343  | -1.328312 | 1 | 1.380304  | 2.197765  | -0.000258 |
| 1  | 1.162532  | 2.002291  | 1.326027  | 1 | -1.000379 | 2.010501  | 0.000077  |
| 6  | -2.439443 | -0.048293 | -0.643019 | 6 | -2.702104 | -0.062134 | 0.000067  |
| 1  | -3.196929 | -0.669382 | -0.167042 | 1 | -3.108219 | 0.948879  | 0.000120  |
| 1  | -2.787848 | 0.988555  | -0.693783 | 1 | -3.088105 | -0.584116 | -0.884494 |
| 1  | -2.282593 | -0.381207 | -1.674443 | 1 | -3.088022 | -0.584177 | 0.884629  |
| 6  | 2.392550  | -0.843464 | -0.423719 | 6 | 2.857435  | -0.658666 | 0.000072  |
| 1  | 2.611687  | -0.843620 | -1.495837 | 1 | 3.267136  | -1.054819 | 0.925907  |
| 1  | 3.326649  | -0.716993 | 0.127581  | 1 | -1.257329 | -1.963685 | -0.000146 |
| 1  | 1.968543  | -1.820708 | -0.174929 | 1 | 3.267021  | -1.055088 | -0.925698 |

### M7

|   |           |           |          |
|---|-----------|-----------|----------|
| 6 | -0.905058 | .104600   | .010746  |
| 6 | -.192982  | 1.240336  | .161668  |
| 6 | 1.243673  | 1.202813  | -.067873 |
| 6 | 1.874948  | .022458   | -.105326 |
| 8 | -.295352  | -1.090858 | -.231993 |
| 1 | -.706705  | 2.177006  | .329389  |
| 1 | 1.769820  | 2.130109  | -.267849 |
| 6 | 2.393469  | -.010088  | -.024741 |
| 1 | 2.707100  | -.443262  | -.980108 |
| 1 | 2.751742  | -.678629  | .764052  |
| 1 | 2.865191  | .965837   | .091960  |
| 6 | 1.071333  | -1.204143 | .225774  |
| 1 | 1.046447  | -1.381019 | 1.314294 |
| 1 | 1.459093  | -2.102125 | -.255330 |
| 1 | 2.927520  | -.076907  | -.341956 |

### M8

|   |           |           |           |
|---|-----------|-----------|-----------|
| 6 | 1.581410  | -0.305499 | 0.208082  |
| 6 | 0.637799  | 0.563551  | -0.171048 |
| 6 | -0.820632 | 0.421821  | -0.026424 |
| 6 | -1.379330 | -0.771888 | -0.037784 |
| 8 | -1.880215 | -1.823681 | -0.061864 |
| 1 | 0.943972  | 1.492333  | -0.652412 |
| 6 | 3.050731  | -0.124321 | -0.029398 |
| 1 | 3.613914  | -0.169419 | 0.909565  |
| 1 | 3.451039  | -0.917080 | -0.672326 |
| 1 | 3.264247  | 0.834320  | -0.508714 |
| 6 | -1.697159 | 1.655178  | 0.104962  |
| 1 | -1.534785 | 2.326744  | -0.744557 |
| 1 | -2.758476 | 1.402246  | 0.129592  |
| 1 | -1.460160 | 2.205539  | 1.020797  |
| 1 | 1.285055  | -1.218286 | 0.722632  |

### M9

|   |           |           |           |
|---|-----------|-----------|-----------|
| 6 | 1.678073  | -0.759576 | -0.106268 |
| 6 | 0.790674  | 0.432906  | 0.044776  |
| 6 | -0.484885 | 0.257452  | 0.312714  |
| 6 | -1.742555 | 0.052524  | 0.571656  |
| 8 | 1.342577  | -1.914692 | -0.010834 |
| 6 | -2.826828 | -0.125933 | -0.462650 |
| 1 | -3.300953 | -1.105547 | -0.348825 |
| 1 | -3.607133 | 0.631508  | -0.338512 |
| 1 | -2.427727 | -0.052090 | -1.474523 |
| 1 | -2.043068 | -0.007415 | 1.617475  |
| 1 | 2.736548  | -0.492854 | -0.327144 |
| 6 | 1.433246  | 1.794724  | -0.119269 |
| 1 | 2.232124  | 1.940553  | 0.615310  |
| 1 | 1.881164  | 1.898729  | -1.113024 |
| 1 | 0.702077  | 2.592078  | 0.010166  |

### M10

|   |           |           |           |
|---|-----------|-----------|-----------|
| 6 | 1.247774  | -0.100842 | 0.187753  |
| 6 | 0.781957  | 0.292492  | 1.320339  |
| 6 | -0.236563 | 0.278768  | 0.182191  |
| 6 | -1.210486 | -0.848132 | 0.182141  |
| 8 | -2.316505 | -0.807949 | -0.303367 |
| 1 | 0.911494  | 0.562525  | 2.354282  |
| 6 | 2.340314  | -0.528009 | -0.708426 |
| 1 | 2.115010  | -1.500443 | -1.156266 |
| 1 | 2.456159  | 0.184717  | -1.530871 |
| 1 | 3.288362  | -0.598282 | -0.170732 |
| 1 | -0.832265 | -1.769340 | 0.684608  |
| 6 | -0.727245 | 1.560220  | -0.470818 |
| 1 | -1.021526 | 1.383573  | -1.508884 |
| 1 | -1.609613 | 1.946607  | 0.046972  |
| 1 | 0.049919  | 2.327260  | -0.451253 |

### M11

|   |           |           |           |
|---|-----------|-----------|-----------|
| 6 | 1.062546  | -1.091325 | -0.000219 |
| 6 | -0.245738 | -0.723131 | 0.000040  |
| 6 | -0.245738 | 0.723112  | 0.000001  |
| 6 | 1.062514  | 1.091352  | 0.000198  |
| 8 | 1.879263  | -0.000007 | -0.000058 |
| 1 | 1.556335  | 2.049060  | 0.000335  |
| 6 | -1.445806 | 1.619754  | -0.000018 |
| 1 | -2.073594 | 1.449691  | 0.880773  |
| 1 | -1.152069 | 2.671571  | -0.000041 |
| 1 | -2.073623 | 1.449654  | -0.880782 |
| 1 | 1.556233  | -2.049093 | -0.000407 |
| 6 | -1.445775 | -1.619740 | 0.000063  |
| 1 | -2.073565 | -1.449767 | 0.880850  |
| 1 | -2.073680 | -1.449632 | -0.880615 |
| 1 | -1.152155 | -2.671559 | -0.000040 |

### CA1

|   |           |           |           |
|---|-----------|-----------|-----------|
| 6 | -1.060405 | -.198174  | -.030053  |
| 6 | -.016377  | -.959127  | -.326890  |
| 6 | 1.191985  | -.064952  | -.429634  |
| 6 | .666665   | 1.328652  | -.120571  |
| 8 | -.624301  | 1.177061  | .082274   |
| 1 | -.035594  | -2.028534 | -.473728  |
| 1 | 1.537682  | .002916   | -1.474618 |
| 6 | -2.508132 | -.408719  | .205775   |
| 1 | -2.790191 | -.060157  | 1.203816  |
| 1 | -3.103437 | .156644   | -.517503  |
| 1 | -2.762113 | -1.465705 | .118299   |
| 6 | 2.400594  | -.437397  | .448393   |
| 1 | 2.804618  | -1.409907 | .158164   |
| 1 | 3.185026  | .313896   | .344414   |
| 1 | 2.112432  | -.487340  | 1.500848  |

CA2 [B3LYP/6-311+G(2d,p)]

|   |           |           |           |
|---|-----------|-----------|-----------|
| 6 | -1.026913 | -0.022257 | -0.006199 |
| 6 | -0.574702 | 1.300120  | 0.152879  |
| 6 | 0.786365  | 1.394374  | -0.093166 |
| 6 | 1.201665  | 0.048127  | -0.433765 |
| 8 | -0.101284 | -0.864855 | -0.340154 |
| 1 | -1.241109 | 2.106482  | 0.433681  |
| 6 | -2.408624 | -0.550349 | 0.154851  |
| 1 | -2.748849 | -0.993182 | -0.784543 |
| 1 | -2.420840 | -1.341568 | 0.908210  |
| 1 | -3.097621 | 0.239666  | 0.449696  |
| 6 | 2.246582  | -0.623592 | 0.435655  |
| 1 | 2.373792  | -1.668829 | 0.152272  |
| 1 | 3.195730  | -0.102350 | 0.310965  |
| 1 | 1.963296  | -0.567895 | 1.487830  |
| 1 | 1.439644  | -0.032024 | -1.498415 |

CA3 [B3LYP/6-311+G(2d,p)]

|   |           |           |           |
|---|-----------|-----------|-----------|
| 6 | 0.555612  | 1.131786  | 0.103603  |
| 6 | 1.094485  | -0.152441 | -0.028349 |
| 6 | 0.070664  | -1.037289 | -0.372992 |
| 6 | -1.132845 | -0.240535 | -0.459773 |
| 8 | -0.714356 | 1.252260  | -0.103499 |
| 6 | -2.294033 | -0.580800 | 0.455212  |
| 1 | -3.083383 | 0.166697  | 0.372528  |
| 1 | -2.692458 | -1.554428 | 0.170419  |
| 1 | -1.960276 | -0.638280 | 1.492250  |
| 1 | -1.450980 | -0.125692 | -1.500563 |
| 1 | 1.080384  | 2.049845  | 0.357558  |
| 6 | 2.546824  | -0.483871 | 0.177108  |
| 1 | 2.990683  | -0.871443 | -0.742438 |
| 1 | 3.124911  | 0.389943  | 0.488971  |
| 1 | 2.661724  | -1.255812 | 0.940415  |

CA4

|   |           |           |           |
|---|-----------|-----------|-----------|
| 6 | 1.643818  | 0.306241  | 0.253868  |
| 6 | 0.195826  | 0.741641  | 0.423914  |
| 6 | -0.632938 | -0.475518 | 0.063659  |
| 6 | 0.236404  | -1.430805 | -0.235277 |
| 8 | 1.581829  | -0.956978 | -0.113608 |
| 1 | 0.144754  | -2.461129 | -0.540809 |
| 6 | -2.125035 | -0.548759 | 0.070509  |
| 1 | -2.557617 | 0.181762  | -0.620843 |
| 1 | -2.483734 | -1.538737 | -0.217763 |
| 1 | -2.523674 | -0.320323 | 1.064606  |
| 6 | -0.114125 | 2.034856  | -0.350726 |
| 1 | -0.010694 | 1.874974  | -1.426576 |
| 1 | -1.131909 | 2.377596  | -0.150908 |
| 1 | 0.582596  | 2.820906  | -0.056474 |
| 1 | 0.101948  | 0.954848  | 1.501942  |

B1

|   |           |           |           |
|---|-----------|-----------|-----------|
| 6 | 1.721144  | 0.035001  | -0.247305 |
| 6 | 0.527715  | -0.078169 | 0.262140  |
| 6 | -0.733338 | 0.441677  | -0.420786 |
| 6 | -1.839438 | -0.619071 | -0.408392 |
| 8 | -1.901383 | -1.603572 | 0.237037  |
| 1 | 0.355887  | -0.575107 | 1.224710  |
| 1 | -0.521608 | 0.663782  | -1.468887 |
| 6 | 3.137645  | -0.231362 | 0.026006  |
| 1 | 3.585025  | -0.860713 | -0.749472 |
| 1 | 3.714636  | 0.698045  | 0.066578  |
| 1 | 3.262920  | -0.745059 | 0.991722  |
| 6 | -1.296734 | 1.712602  | 0.252012  |
| 1 | -0.559022 | 2.513604  | 0.184212  |
| 1 | -2.218326 | 2.038085  | -0.235668 |
| 1 | -1.510413 | 1.531882  | 1.308452  |

B2

|   |           |           |           |
|---|-----------|-----------|-----------|
| 6 | -1.165800 | -0.206440 | -0.000088 |
| 6 | -0.486880 | 1.079347  | 0.000045  |
| 6 | 0.914164  | 1.332715  | 0.000186  |
| 6 | 1.966287  | 0.499349  | 0.000098  |
| 8 | -0.578716 | -1.286163 | -0.000185 |
| 1 | -1.124106 | 1.958964  | 0.000056  |
| 1 | 1.166798  | 2.396121  | 0.000352  |
| 6 | -2.688287 | -0.158341 | -0.000072 |
| 1 | -3.077309 | -1.175444 | -0.000513 |
| 1 | -3.060865 | 0.372888  | 0.881393  |
| 1 | -3.060917 | 0.373708  | -0.881015 |
| 6 | 2.458672  | -0.871530 | 0.000007  |
| 1 | 1.623303  | -1.580841 | -0.001017 |
| 1 | 3.087844  | -1.053015 | -0.879810 |
| 1 | 3.086045  | -1.053681 | 0.880982  |

B3

|   |           |           |           |
|---|-----------|-----------|-----------|
| 6 | -1.246016 | -0.587959 | -0.053773 |
| 6 | -0.056027 | 0.210246  | -0.076925 |
| 6 | 1.142778  | -0.418963 | -0.005213 |
| 1 | -0.067663 | 1.309700  | -0.132191 |
| 1 | 1.106827  | -1.505237 | 0.035634  |
| 6 | -2.492110 | 0.211803  | 0.031946  |
| 1 | -3.321322 | -0.258170 | -0.506067 |
| 1 | -2.780188 | 0.133930  | 1.095389  |
| 1 | -2.432615 | 1.286554  | -0.216435 |
| 6 | 2.479644  | 0.232861  | 0.034272  |
| 1 | 3.004955  | -0.036641 | 0.958261  |
| 1 | 3.104992  | -0.138098 | -0.786244 |
| 1 | 2.415411  | 1.320029  | -0.030187 |

### C6H7O

|   |           |           |           |
|---|-----------|-----------|-----------|
| 6 | -1.044960 | 0.005233  | -0.000076 |
| 6 | -0.598785 | 1.304412  | -0.000208 |
| 6 | 0.808829  | 1.262767  | 0.000218  |
| 6 | 1.182026  | -0.095457 | -0.000047 |
| 8 | 0.017230  | -0.853711 | -0.000207 |
| 1 | -1.227145 | 2.181567  | -0.000295 |
| 1 | 1.494008  | 2.095345  | 0.000252  |
| 6 | -2.396372 | -0.605289 | 0.000176  |
| 1 | -2.543978 | -1.238044 | -0.881416 |
| 1 | -2.544196 | -1.236890 | 0.882578  |
| 1 | -3.161508 | 0.172185  | -0.000434 |
| 6 | 2.396156  | -0.734033 | 0.000065  |
| 1 | 3.309713  | -0.157425 | 0.000262  |
| 1 | 2.453904  | -1.812854 | -0.000062 |

### M2-R1

|   |           |           |           |
|---|-----------|-----------|-----------|
| 6 | -1.185422 | -0.200722 | 0.000123  |
| 6 | -0.010215 | -0.975920 | 0.000050  |
| 6 | 1.089239  | -0.088047 | -0.000128 |
| 6 | 0.546514  | 1.173526  | -0.000170 |
| 8 | -0.813425 | 1.135454  | 0.000154  |
| 1 | 0.020476  | -2.054741 | 0.000069  |
| 6 | -2.520696 | -0.522414 | -0.000027 |
| 1 | 0.991703  | 2.155227  | -0.000013 |
| 6 | 2.547450  | -0.434863 | 0.000015  |
| 1 | 2.813693  | -1.026204 | -0.880986 |
| 1 | 3.167965  | 0.463699  | -0.000841 |
| 1 | 2.813788  | -1.024637 | 0.882066  |
| 1 | -3.274218 | 0.251966  | -0.000386 |
| 1 | -2.827222 | -1.558307 | -0.000325 |

### M2-R2

|   |           |           |           |
|---|-----------|-----------|-----------|
| 6 | -1.032171 | -0.176943 | 0.000009  |
| 6 | 0.053527  | -0.981626 | 0.000052  |
| 6 | 1.234180  | -0.130260 | -0.000062 |
| 6 | 0.718411  | 1.163559  | 0.000039  |
| 8 | -0.643674 | 1.145113  | 0.000065  |
| 1 | 0.046277  | -2.060546 | 0.000080  |
| 6 | -2.496652 | -0.427082 | 0.000001  |
| 1 | -2.971043 | 0.012721  | 0.882657  |
| 1 | -2.971043 | 0.012740  | -0.882646 |
| 1 | -2.693555 | -1.499700 | -0.000008 |
| 1 | 1.182188  | 2.135551  | 0.000067  |
| 6 | 2.577561  | -0.517248 | -0.000111 |
| 1 | 3.371380  | 0.218325  | -0.000143 |
| 1 | 2.856042  | -1.562385 | -0.000089 |

### TS\_M1\_CA2

|   |           |           |           |
|---|-----------|-----------|-----------|
| 6 | 1.091054  | -0.004836 | -0.017956 |
| 6 | 0.716654  | 1.301665  | -0.054288 |
| 6 | -0.735929 | 1.413055  | -0.067656 |
| 6 | -1.106585 | 0.050274  | 0.092773  |
| 8 | 0.003779  | -0.818706 | 0.085319  |
| 1 | 1.403881  | 2.134448  | -0.104850 |
| 1 | -1.173834 | 0.795345  | 1.095441  |
| 6 | 2.414469  | -0.682745 | -0.027464 |
| 1 | 2.565220  | -1.248933 | 0.896463  |
| 1 | 2.482066  | -1.389144 | -0.859767 |
| 1 | 3.214453  | 0.051647  | -0.122897 |
| 6 | -2.423095 | -0.639223 | -0.105591 |
| 1 | -2.543571 | -1.482400 | 0.577734  |
| 1 | -3.231255 | 0.075601  | 0.045846  |
| 1 | -2.486605 | -1.016047 | -1.129439 |

### TS\_CA2\_M4 [B3LYP/6-311+G(2d,p)]

|   |           |           |           |
|---|-----------|-----------|-----------|
| 6 | -1.027415 | -0.035139 | -0.009142 |
| 6 | -0.565445 | 1.294137  | 0.152288  |
| 6 | 0.787348  | 1.385160  | -0.095941 |
| 6 | 1.234721  | 0.068764  | -0.437141 |
| 8 | -0.126231 | -0.887835 | -0.341752 |
| 1 | -1.231748 | 2.100618  | 0.433439  |
| 6 | -2.423878 | -0.527246 | 0.158121  |
| 1 | -2.779911 | -0.955496 | -0.782097 |
| 1 | -2.451496 | -1.322752 | 0.906296  |
| 1 | -3.091299 | 0.278190  | 0.461314  |
| 6 | 2.255649  | -0.621536 | 0.440089  |
| 1 | 2.362502  | -1.669559 | 0.159724  |
| 1 | 3.217946  | -0.122767 | 0.318810  |
| 1 | 1.968543  | -0.555057 | 1.490445  |
| 1 | 1.449430  | -0.035333 | -1.503561 |

### TS\_CA2\_M2

|   |           |           |           |
|---|-----------|-----------|-----------|
| 6 | -1.006415 | 0.105492  | -0.020526 |
| 6 | -0.212341 | 1.180921  | -0.229720 |
| 6 | 1.117540  | 0.743586  | -0.682790 |
| 6 | 0.981710  | -0.640613 | -0.541721 |
| 8 | -0.297623 | -1.064912 | -0.201500 |
| 1 | -0.536378 | 2.208726  | -0.141333 |
| 6 | -2.437643 | -0.060789 | 0.343693  |
| 1 | -2.978599 | -0.602652 | -0.438089 |
| 1 | -2.537575 | -0.635498 | 1.269248  |
| 1 | -2.907442 | 0.913223  | 0.482981  |
| 6 | 2.056082  | 0.008856  | 0.809763  |
| 1 | 1.610196  | -0.645969 | 1.565514  |
| 1 | 3.049714  | -0.313988 | 0.517756  |
| 1 | 2.093824  | 1.017898  | 1.204258  |
| 1 | 1.593660  | -1.447166 | -0.920534 |

TS\_ M4 → 1,2-butadiene + CH<sub>2</sub>CO

|   |           |           |           |
|---|-----------|-----------|-----------|
| 6 | -1.570926 | 0.346728  | -0.117778 |
| 6 | -0.449230 | -0.850135 | -0.331958 |
| 6 | 0.814694  | -0.683593 | 0.054894  |
| 6 | 2.023945  | -0.444814 | 0.459477  |
| 8 | -1.240860 | 1.487468  | 0.080046  |
| 6 | -2.768709 | -0.376694 | 0.121336  |
| 1 | -1.300628 | -1.107531 | 0.605303  |
| 1 | -3.656010 | 0.149889  | 0.460529  |
| 1 | -2.928741 | -1.294458 | -0.432277 |
| 6 | 3.005141  | 0.469316  | -0.238906 |
| 1 | 3.324083  | 1.263641  | 0.441933  |
| 1 | 3.897370  | -0.087331 | -0.541185 |
| 1 | 2.560045  | 0.929277  | -1.120658 |
| 1 | 2.365634  | -0.933913 | 1.372652  |
| 1 | -0.664368 | -1.584156 | -1.109054 |

TS\_ M4 → 2,3-pentadiene + CO

|   |           |           |           |
|---|-----------|-----------|-----------|
| 6 | 1.224226  | .536338   | -.337651  |
| 6 | .685562   | -.665362  | -.765884  |
| 6 | -.706186  | -.527369  | -1.172527 |
| 6 | -1.781263 | -.117738  | -.508319  |
| 8 | 1.352701  | 1.642035  | -.019953  |
| 6 | 1.284356  | -1.134424 | .997468   |
| 1 | 2.324007  | -1.447815 | .924797   |
| 1 | 1.128864  | -.413582  | 1.797846  |
| 1 | .608245   | -1.978910 | 1.108879  |
| 6 | -1.951166 | .361592   | .917993   |
| 1 | -2.250701 | 1.416259  | .935599   |
| 1 | -2.747909 | -.198177  | 1.420152  |
| 1 | -1.043291 | .263859   | 1.513913  |
| 1 | -2.715417 | -.116012  | -1.075531 |
| 1 | 1.341416  | -1.380119 | -1.252513 |

TS\_ M4 → 3-methylbuta-1,2-diene + CO

|   |           |           |           |
|---|-----------|-----------|-----------|
| 6 | -1.432428 | .021723   | .085805   |
| 6 | -.766347  | 1.329114  | -.037883  |
| 6 | .531421   | 1.352657  | -.292389  |
| 6 | 1.222556  | .132339   | -.443272  |
| 8 | -2.467285 | -.440788  | .323129   |
| 1 | -1.459707 | 2.149735  | .114393   |
| 6 | .067640   | -1.429237 | -.328008  |
| 6 | 2.323624  | -.147363  | .575051   |
| 1 | 2.751611  | -1.142877 | .441320   |
| 1 | 3.122032  | .588189   | .457700   |
| 1 | 1.938489  | -.064983  | 1.593966  |
| 1 | 1.558331  | -.028188  | -1.470383 |
| 1 | .999794   | -1.936435 | -.602724  |
| 1 | -.214693  | -1.865529 | .631800   |
| 1 | -.636369  | -1.729007 | -1.106921 |

TS\_ M4 → 1-butyne + CH<sub>2</sub>CO

|   |           |           |           |
|---|-----------|-----------|-----------|
| 6 | -1.612599 | 0.333249  | -0.052983 |
| 6 | -0.463707 | -1.404025 | -0.257880 |
| 6 | 0.685163  | -1.107259 | 0.120155  |
| 6 | 1.549267  | -0.110718 | 0.561850  |
| 8 | -2.712909 | -0.068454 | 0.073008  |
| 1 | -1.146140 | -2.177304 | -0.546046 |
| 6 | -0.732356 | 1.399484  | -0.067087 |
| 1 | 0.565265  | 0.770149  | 0.451951  |
| 1 | -0.303623 | 1.644926  | -1.033476 |
| 1 | -1.020242 | 2.239195  | 0.556497  |
| 6 | 2.708654  | 0.353993  | -0.311196 |
| 1 | 3.064984  | 1.332166  | 0.022299  |
| 1 | 3.551973  | -0.340448 | -0.264516 |
| 1 | 2.402100  | 0.437780  | -1.356559 |
| 1 | 1.782421  | -0.147177 | 1.628631  |

TS\_ M1\_CA1

|   |           |           |          |
|---|-----------|-----------|----------|
| 6 | 1.003773  | .100833   | -.010266 |
| 6 | .226758   | 1.204147  | -.084956 |
| 6 | -1.074615 | .713546   | -.501684 |
| 6 | -1.017940 | -.691573  | -.736484 |
| 8 | .291433   | -1.022781 | -.336862 |
| 1 | .521378   | 2.219258  | .128300  |
| 1 | -1.879963 | 1.331172  | -.874996 |
| 6 | 2.435851  | -.101736  | .332130  |
| 1 | 2.535218  | -.760918  | 1.199400 |
| 1 | 2.957521  | -.581056  | -.501238 |
| 1 | 2.922051  | .848615   | .553787  |
| 6 | -2.031261 | -.227379  | .817484  |
| 1 | -1.592707 | -1.064444 | 1.350132 |
| 1 | -2.015388 | .651649   | 1.466655 |
| 1 | -3.034976 | -.449058  | .475514  |

TS\_ CA1\_M2

|   |           |           |           |
|---|-----------|-----------|-----------|
| 6 | -1.087665 | -0.175277 | 0.001312  |
| 6 | 0.002813  | -0.962362 | -0.085294 |
| 6 | 1.144954  | -0.051377 | -0.087337 |
| 6 | 0.657616  | 1.306643  | 0.056353  |
| 8 | -0.720141 | 1.149709  | 0.027923  |
| 1 | 0.021906  | -2.039444 | -0.140644 |
| 1 | 1.119552  | 0.692737  | -1.100102 |
| 6 | -2.546381 | -0.455197 | 0.051077  |
| 1 | -2.985152 | -0.021249 | 0.953954  |
| 1 | -3.054455 | -0.006131 | -0.807121 |
| 1 | -2.734943 | -1.529048 | 0.048423  |
| 6 | 2.585756  | -0.441933 | 0.111817  |
| 1 | 2.906050  | -1.208690 | -0.597525 |
| 1 | 3.230149  | 0.433044  | 0.011577  |
| 1 | 2.715463  | -0.841878 | 1.120486  |

TS\_CA1\_B1 [MP2/6-31G(d')]

|   |           |           |           |
|---|-----------|-----------|-----------|
| 6 | -1.188423 | -.288551  | -.049007  |
| 6 | -.110224  | -.902092  | -.377158  |
| 6 | 1.215060  | -.123672  | -.468120  |
| 6 | .831198   | 1.303651  | -.145693  |
| 8 | -.323320  | 1.527225  | .122121   |
| 1 | -.042547  | -1.970756 | -.591681  |
| 1 | 1.608823  | -.153278  | -1.497221 |
| 6 | -2.630992 | -.413264  | .211413   |
| 1 | -2.862265 | -.088773  | 1.233777  |
| 1 | -3.198395 | .229573   | -.473189  |
| 1 | -2.984444 | -1.448991 | .088127   |
| 6 | 2.285787  | -.648933  | .501054   |
| 1 | 2.518687  | -1.697346 | .278561   |
| 1 | 3.208445  | -.063483  | .415611   |
| 1 | 1.923813  | -.587579  | 1.534123  |

TS\_CA1\_pC3H4+methylketene

|   |           |           |           |
|---|-----------|-----------|-----------|
| 6 | -1.312788 | -.603021  | -.065800  |
| 6 | -.228965  | -1.143692 | -.340847  |
| 6 | 1.356671  | -.012193  | -.448758  |
| 6 | .784226   | 1.235601  | -.176758  |
| 8 | -.316101  | 1.585841  | .068119   |
| 1 | .212103   | -2.100341 | -.561593  |
| 1 | 1.642064  | -.091209  | -1.500804 |
| 6 | -2.694012 | -.249513  | .237420   |
| 1 | -2.768179 | .227504   | 1.218970  |
| 1 | -3.084108 | .462409   | -.495684  |
| 1 | -3.350035 | -1.129464 | .237769   |
| 6 | 2.406404  | -.552092  | .511788   |
| 1 | 2.541020  | -1.621135 | .330942   |
| 1 | 3.375270  | -.067042  | .374710   |
| 1 | 2.091462  | -.417985  | 1.548464  |

TS\_B1 → propyne + methylketene

|   |           |           |           |
|---|-----------|-----------|-----------|
| 6 | -1.669622 | -0.717462 | -0.162705 |
| 6 | -0.430100 | -0.865616 | -0.231073 |
| 6 | 0.677015  | 0.456397  | 0.428192  |
| 6 | 1.997978  | -0.040912 | 0.284146  |
| 8 | 2.563882  | -0.987158 | -0.124979 |
| 1 | 0.269467  | -1.618034 | -0.585414 |
| 1 | 0.424689  | 0.493232  | 1.490052  |
| 6 | -2.981548 | -0.152399 | 0.125526  |
| 1 | -3.471420 | 0.182442  | -0.794353 |
| 1 | -3.637733 | -0.897510 | 0.588267  |
| 1 | -2.935640 | 0.707233  | 0.809556  |
| 6 | 0.392076  | 1.774769  | -0.292061 |
| 1 | -0.677206 | 1.981135  | -0.239673 |
| 1 | 0.927932  | 2.609290  | 0.164254  |
| 1 | 0.674063  | 1.710820  | -1.345007 |

TS\_B1\_B3+CO

|   |           |           |           |
|---|-----------|-----------|-----------|
| 6 | 1.765227  | 0.012446  | -0.300634 |
| 6 | 0.603406  | 0.286807  | 0.267322  |
| 6 | -0.603241 | 0.678410  | -0.449683 |
| 6 | -1.706843 | -1.030199 | -0.584118 |
| 8 | -1.859376 | -1.641527 | 0.378039  |
| 1 | 0.507924  | 0.180884  | 1.356596  |
| 1 | -0.463328 | 0.846323  | -1.512856 |
| 6 | 3.153030  | -0.275833 | 0.070957  |
| 1 | 3.521551  | -1.190854 | -0.403926 |
| 1 | 3.817760  | 0.539195  | -0.237304 |
| 1 | 3.254786  | -0.390923 | 1.161614  |
| 6 | -1.586828 | 1.597370  | 0.228974  |
| 1 | -1.188168 | 2.618385  | 0.274903  |
| 1 | -2.533871 | 1.638442  | -0.314999 |
| 1 | -1.790151 | 1.276754  | 1.254753  |

TS\_B3\_C5H8-12

|   |           |           |           |
|---|-----------|-----------|-----------|
| 6 | -1.471861 | .674951   | -.162976  |
| 6 | -.151080  | .890141   | .040362   |
| 6 | .719464   | -.230923  | -.276058  |
| 1 | .289501   | 1.816238  | .402314   |
| 1 | .565217   | -.695170  | -1.248036 |
| 6 | -1.843756 | -.644769  | .140782   |
| 1 | -1.883710 | -.873853  | 1.211296  |
| 1 | -2.618198 | -1.168866 | -.420687  |
| 1 | -.545286  | -1.108430 | .080970   |
| 6 | 2.169308  | -.229283  | .135357   |
| 1 | 2.538895  | -1.257913 | .184519   |
| 1 | 2.803507  | .296037   | -.590277  |
| 1 | 2.317621  | .231248   | 1.115094  |

TS\_B3\_C5H8-13

|   |           |           |          |
|---|-----------|-----------|----------|
| 6 | -.776232  | -.148589  | -.372717 |
| 6 | .063353   | .891618   | .008108  |
| 6 | 1.420624  | .583983   | .042796  |
| 1 | -.313327  | 1.897320  | .195810  |
| 1 | 2.204121  | 1.332545  | -.021310 |
| 6 | -2.179472 | -.255363  | .097161  |
| 1 | -2.851572 | -.640192  | -.675554 |
| 1 | -2.181063 | -1.012705 | .896533  |
| 1 | -2.598166 | .662767   | .534749  |
| 6 | 1.661132  | -.836907  | .051016  |
| 1 | 2.606378  | -1.185271 | -.368107 |
| 1 | 1.445436  | -1.357866 | .984447  |
| 1 | .551768   | -1.105053 | -.504750 |

### TS\_M1\_B2

|   |           |           |          |
|---|-----------|-----------|----------|
| 6 | 1.137663  | -.184663  | -.037982 |
| 6 | .527212   | 1.126065  | .057746  |
| 6 | -.864786  | 1.331418  | -.030366 |
| 6 | -1.851586 | .431900   | -.204898 |
| 8 | .473735   | -1.200375 | -.238076 |
| 1 | 1.167652  | 1.999133  | .122157  |
| 1 | -1.173083 | 2.378422  | -.099825 |
| 6 | 2.649079  | -.261474  | .120666  |
| 1 | 2.945589  | -1.303002 | .237637  |
| 1 | 3.136424  | .146830   | -.771228 |
| 1 | 2.995688  | .321792   | .977980  |
| 6 | -2.435659 | -.842777  | .193738  |
| 1 | -1.903280 | -1.322860 | 1.020522 |
| 1 | -3.484578 | -.688867  | .481792  |
| 1 | -2.445829 | -1.531250 | -.657852 |

### TS\_B2\_M3

|   |           |           |           |
|---|-----------|-----------|-----------|
| 6 | -1.399539 | -0.071085 | 0.042574  |
| 6 | -0.031671 | 0.179611  | -0.399919 |
| 6 | 0.894823  | -0.892054 | -0.499090 |
| 6 | 1.961544  | -0.472438 | 0.177850  |
| 8 | -1.772419 | -1.179578 | 0.404406  |
| 1 | 0.300654  | 1.194446  | -0.579846 |
| 1 | 0.605897  | -1.919174 | -0.700140 |
| 6 | -2.362599 | 1.107336  | -0.019930 |
| 1 | -2.223748 | 1.704440  | -0.924870 |
| 1 | -3.385333 | 0.734962  | 0.025905  |
| 1 | -2.188490 | 1.764482  | 0.839230  |
| 6 | 2.871290  | 0.669416  | 0.246490  |
| 1 | 2.659367  | 1.482626  | -0.463566 |
| 1 | 2.933856  | 1.067742  | 1.262905  |
| 1 | 3.874054  | 0.282381  | 0.017289  |

### TS\_B2\_M5

|   |           |           |           |
|---|-----------|-----------|-----------|
| 6 | -1.215286 | -0.204489 | -0.023696 |
| 6 | -0.425361 | 1.028024  | 0.091803  |
| 6 | 0.924331  | 1.123123  | -0.066524 |
| 6 | 1.869207  | 0.152347  | -0.493035 |
| 8 | -0.730504 | -1.310366 | -0.219941 |
| 1 | -0.971258 | 1.946216  | 0.280264  |
| 1 | 1.344667  | 2.127201  | 0.002271  |
| 6 | -2.722607 | -0.035804 | 0.115082  |
| 1 | -2.973967 | 0.476360  | 1.049115  |
| 1 | -3.112480 | 0.577259  | -0.704131 |
| 1 | -3.199959 | -1.014412 | 0.092329  |
| 6 | 2.567598  | -0.694581 | 0.345479  |
| 1 | 2.353999  | -0.813113 | 1.414141  |
| 1 | 3.285476  | -1.397705 | -0.074873 |
| 1 | 3.130252  | 0.369401  | -0.114239 |

### TS\_B2\_M6

|   |           |           |           |
|---|-----------|-----------|-----------|
| 6 | 1.098888  | -0.141670 | 0.005629  |
| 8 | 0.447315  | -1.204274 | -0.120757 |
| 6 | -1.799486 | 0.322618  | -0.374501 |
| 6 | -0.896356 | 1.279125  | -0.015724 |
| 6 | 0.482041  | 1.142281  | 0.104908  |
| 1 | -1.336334 | 2.276210  | 0.041855  |
| 1 | 1.088916  | 2.029452  | 0.217781  |
| 6 | 2.611575  | -0.232167 | 0.032713  |
| 1 | 3.088807  | 0.716723  | 0.282838  |
| 1 | 2.915290  | -0.996350 | 0.751799  |
| 1 | 2.964986  | -0.555346 | -0.951224 |
| 6 | -2.402920 | -0.778637 | 0.204416  |
| 1 | -3.085984 | -1.386882 | -0.385519 |
| 1 | -1.256572 | -1.134684 | -0.025844 |
| 1 | -2.520076 | -0.864227 | 1.289730  |

### TS\_M5\_M7

|   |           |           |           |
|---|-----------|-----------|-----------|
| 6 | .940142   | -.087283  | -.102082  |
| 6 | .225508   | 1.111397  | -.395316  |
| 6 | -1.095161 | 1.257664  | .044292   |
| 6 | -1.889083 | .147738   | .324885   |
| 8 | .427190   | -1.229587 | .064885   |
| 1 | .820630   | 2.000754  | -.560780  |
| 1 | -1.434287 | 2.253333  | .322841   |
| 6 | 2.420705  | .021122   | .201653   |
| 1 | 2.562434  | .061819   | 1.286270  |
| 1 | 2.945923  | -.859662  | -.170239  |
| 1 | 2.855607  | .921040   | -.235743  |
| 6 | -1.504424 | -1.060793 | -.253405  |
| 1 | -1.216993 | -1.062599 | -1.297773 |
| 1 | -1.887932 | -2.004168 | .118886   |
| 1 | -2.649024 | .187110   | 1.097300  |

### TS\_M6\_C6H6+H2O

|   |           |           |           |
|---|-----------|-----------|-----------|
| 6 | 1.299562  | 0.147151  | -0.100738 |
| 8 | 0.643806  | -1.257758 | -0.237413 |
| 6 | -1.816868 | 0.240718  | 0.067621  |
| 6 | -0.972274 | 1.246183  | -0.021018 |
| 6 | 0.482327  | 1.215089  | -0.116486 |
| 1 | -1.414366 | 2.240795  | 0.006518  |
| 1 | 0.983058  | 2.175462  | -0.134456 |
| 6 | 2.615115  | -0.236522 | 0.233376  |
| 1 | 3.202383  | 0.456694  | 0.825388  |
| 1 | 1.531142  | -1.484420 | 0.416039  |
| 1 | 3.181774  | -0.757968 | -0.539079 |
| 6 | -2.657672 | -0.759947 | 0.096712  |
| 1 | -3.100477 | -1.158999 | -0.814735 |
| 1 | -0.256225 | -1.308573 | 0.152082  |
| 1 | -2.978878 | -1.216952 | 1.030745  |



#### TS\_M2\_CA3

|   |           |           |           |
|---|-----------|-----------|-----------|
| 6 | 0.636689  | 1.144244  | 0.031023  |
| 6 | 1.156233  | -0.108971 | 0.013945  |
| 6 | 0.052466  | -1.073146 | 0.005672  |
| 6 | -1.073633 | -0.208438 | -0.103749 |
| 8 | -0.718500 | 1.153230  | -0.047994 |
| 1 | -0.699728 | -0.761471 | -1.144227 |
| 6 | -2.532738 | -0.471292 | 0.122984  |
| 1 | -3.157428 | 0.162587  | -0.509419 |
| 1 | -2.748106 | -1.519804 | -0.079854 |
| 1 | -2.781212 | -0.266192 | 1.167120  |
| 6 | 2.607969  | -0.481153 | 0.049516  |
| 1 | 3.253238  | 0.397671  | 0.128798  |
| 1 | 2.815788  | -1.137396 | 0.898793  |
| 1 | 2.887593  | -1.031286 | -0.853813 |
| 1 | 1.095937  | 2.122587  | 0.060201  |

#### TS\_CA3\_M11

|   |           |           |           |
|---|-----------|-----------|-----------|
| 6 | -0.461256 | 1.204329  | 0.322987  |
| 6 | -0.917984 | 0.005772  | -0.098546 |
| 6 | 0.191192  | -0.701463 | -0.779711 |
| 6 | 1.251325  | 0.177319  | -0.528652 |
| 8 | 0.883020  | 1.369025  | 0.080022  |
| 6 | 1.424953  | -1.283027 | 0.561913  |
| 1 | 1.733598  | -0.687911 | 1.426846  |
| 1 | 0.649210  | -1.973624 | 0.874828  |
| 1 | 2.248843  | -1.832446 | 0.119322  |
| 1 | -0.936996 | 2.045901  | 0.805351  |
| 6 | -2.314362 | -0.522356 | 0.018540  |
| 1 | -2.336519 | -1.437121 | 0.620867  |
| 1 | -2.990115 | 0.202457  | 0.479848  |
| 1 | -2.707870 | -0.784715 | -0.967171 |
| 1 | 2.232478  | 0.231816  | -0.979249 |

#### TS\_CA3\_M9 [B3LYP/6-311+G(2d,p)]

|   |           |           |           |
|---|-----------|-----------|-----------|
| 6 | 0.558192  | 1.137137  | 0.100564  |
| 6 | 1.088926  | -0.161105 | -0.028533 |
| 6 | 0.065721  | -1.033865 | -0.372391 |
| 6 | -1.140136 | -0.273270 | -0.469001 |
| 8 | -0.698431 | 1.286014  | -0.101649 |
| 6 | -2.295408 | -0.579601 | 0.459656  |
| 1 | -3.068212 | 0.185028  | 0.380752  |
| 1 | -2.721484 | -1.544705 | 0.183648  |
| 1 | -1.952095 | -0.641793 | 1.493178  |
| 1 | -1.455774 | -0.125441 | -1.505260 |
| 1 | 1.112751  | 2.039515  | 0.352664  |
| 6 | 2.541106  | -0.494747 | 0.178684  |
| 1 | 2.990522  | -0.872026 | -0.742547 |
| 1 | 3.116503  | 0.377044  | 0.501265  |
| 1 | 2.654829  | -1.273027 | 0.935621  |

#### TS\_M2\_CA4

|   |           |           |           |
|---|-----------|-----------|-----------|
| 6 | 0.455849  | 1.219421  | -0.296778 |
| 6 | 0.930529  | 0.012843  | 0.076261  |
| 6 | -0.240165 | -0.641078 | 0.651807  |
| 6 | -1.359021 | 0.240279  | 0.657765  |
| 8 | -0.871279 | 1.372314  | -0.020718 |
| 1 | -0.207498 | -1.542560 | 1.249921  |
| 6 | -1.550774 | -1.178733 | -0.594352 |
| 1 | -1.972202 | -0.487590 | -1.316147 |
| 1 | -0.815155 | -1.810407 | -1.100319 |
| 1 | -2.314753 | -1.774967 | -0.110666 |
| 1 | 0.946516  | 2.066108  | -0.756002 |
| 6 | 2.312391  | -0.543669 | -0.072415 |
| 1 | 2.323117  | -1.421440 | -0.727894 |
| 1 | 2.993790  | 0.195561  | -0.498998 |
| 1 | 2.723561  | -0.857601 | 0.892121  |

#### TS\_M9\_2-pentyne+CO

|   |           |           |           |
|---|-----------|-----------|-----------|
| 6 | 0.735754  | 1.072944  | -0.084019 |
| 6 | 0.687598  | -0.674830 | -0.057112 |
| 6 | -0.540677 | -0.940488 | -0.303386 |
| 6 | -1.599599 | -0.048337 | -0.527186 |
| 8 | 1.667410  | 1.741781  | 0.077365  |
| 6 | -2.728106 | 0.086109  | 0.487677  |
| 1 | -2.337827 | 0.093792  | 1.507565  |
| 1 | -3.280701 | 1.013630  | 0.319073  |
| 1 | -3.434600 | -0.743759 | 0.400853  |
| 1 | -1.951232 | 0.000587  | -1.561991 |
| 1 | -0.777459 | 0.985981  | -0.401313 |
| 6 | 2.008620  | -1.308194 | 0.202168  |
| 1 | 2.734006  | -1.028314 | -0.567167 |
| 1 | 2.415267  | -0.985583 | 1.164805  |
| 1 | 1.911723  | -2.393800 | 0.210399  |

#### TS\_CA4\_M11

|   |           |           |           |
|---|-----------|-----------|-----------|
| 6 | -1.117135 | 1.016614  | -0.065252 |
| 6 | 0.199628  | 0.747376  | 0.013453  |
| 6 | 0.256184  | -0.718995 | 0.075767  |
| 6 | -1.087564 | -1.255215 | -0.022421 |
| 8 | -1.879604 | -0.118119 | -0.032651 |
| 1 | -0.324183 | -1.152996 | 1.112855  |
| 6 | 1.496380  | -1.555955 | -0.090996 |
| 1 | 2.288240  | -1.270507 | 0.605672  |
| 1 | 1.257273  | -2.611220 | 0.049511  |
| 1 | 1.883288  | -1.432836 | -1.106042 |
| 1 | -1.657919 | 1.949171  | -0.133529 |
| 6 | 1.353193  | 1.700628  | 0.028503  |
| 1 | 1.934614  | 1.610391  | 0.951740  |
| 1 | 2.039034  | 1.511339  | -0.803383 |
| 1 | 1.012368  | 2.734887  | -0.049947 |

**TS\_CA4\_pC3H4+CH3CHCO**

|   |           |           |           |
|---|-----------|-----------|-----------|
| 6 | -0.139586 | -1.729682 | -0.341471 |
| 6 | -0.810471 | -0.731238 | -0.017032 |
| 6 | 0.320621  | 0.815455  | 0.446496  |
| 6 | 1.590850  | 0.236322  | 0.310809  |
| 8 | 1.931472  | -0.842631 | -0.030337 |
| 1 | 0.077743  | 0.981015  | 1.499977  |
| 6 | -0.010789 | 2.006806  | -0.443605 |
| 1 | -1.074655 | 2.235954  | -0.368162 |
| 1 | 0.539915  | 2.901149  | -0.144367 |
| 1 | 0.223208  | 1.788300  | -1.487649 |
| 1 | 0.177361  | -2.699228 | -0.644042 |
| 6 | -2.220113 | -0.268550 | 0.169074  |
| 1 | -2.356864 | 0.251519  | 1.122254  |
| 1 | -2.516382 | 0.424618  | -0.623728 |
| 1 | -2.905166 | -1.116955 | 0.142781  |

**Table S2: Hindrance potentials and barrier heights for the set of reference molecules and radicals calculated at the B3LYP/6-31+G(d,p) level of theory.**

| Species | Rotation characteristics |          |          |
|---------|--------------------------|----------|----------|
|         | V (kcal/mol)             | # minima | symmetry |
|         | 1.25                     | 3        | 3        |
|         | 19                       | 2        | 2        |
|         | 2.96                     | 1        | 1        |
|         | 0.96                     | 2        | 2        |
|         | 1.41                     | 2        | 1        |
|         | 4.42                     | 3        | 3        |
|         | 3.1                      | 1        | 1        |
|         | 3.05                     | 2        | 1        |
|         | 1.4                      | 3        | 3        |
|         | 3.93                     | 2        | 1        |
|         | 6.3                      | 1        | 1        |
|         | 0.73                     | 3        | 3        |
|         | 1.2                      | 3        | 3        |
|         | 7.04                     | 1        | 1        |
|         | 1.5                      | 3        | 3        |
|         | 0.71                     | 3        | 3        |
|         | 2.77                     | 1        | 1        |
|         | 2.32                     | 2        | 1        |
|         | 3.16                     | 1        | 1        |
|         | 3.17                     | 2        | 1        |
|         | 10                       | 1        | 1        |
|         | 0.36                     | 3        | 3        |
|         | 2.42                     | 3        | 3        |
|         | 8.77                     | 1        | 1        |
|         | 3.09                     | 3        | 3        |
|         | 1.66                     | 3        | 1        |
|         | 5.09                     | 1        | 1        |
|         | 2.17                     | 1        | 1        |
|         | 0.2                      | 3        | 3        |
|         | 0.27                     | 3        | 3        |
|         | 6.18                     | 1        | 1        |
|         | 0.47                     | 2        | 2        |

**Table S3: Zero-point corrected energies at the CBS-QB3 level of theory.**

| Name                                                        | E (0K) CBS-QB3 |
|-------------------------------------------------------------|----------------|
| M1                                                          | -308.112744    |
| M2                                                          | -308.108787    |
| M3                                                          | -308.042442    |
| M4                                                          | -308.066250    |
| M5                                                          | -308.080865    |
| M6                                                          | -308.046407    |
| M7                                                          | -308.083655    |
| M8                                                          | -308.075018    |
| M9                                                          | -308.058926    |
| M10                                                         | -308.038292    |
| M11                                                         | -308.104954    |
| CA1                                                         | -308.017603    |
| CA2                                                         | -308.019253    |
| CA3                                                         | -308.011074    |
| CA4                                                         | -308.012896    |
| B1                                                          | -307.970926    |
| B2                                                          | -307.985878    |
| B3                                                          | -194.795153    |
| C <sub>6</sub> H <sub>7</sub> O                             | -307.478627    |
| M2-R1                                                       | -307.473833    |
| M2-R2                                                       | -307.467661    |
| TS_M1_CA2                                                   | -307.983271    |
| TS_CA2_M4                                                   | -308.018912    |
| TS_CA2_M2                                                   | -307.978963    |
| TS_M4_1,2-butadiene+CH <sub>2</sub> CO                      | -307.94322     |
| TS_M4_2,3-pentadiene +CO                                    | -307.925002    |
| TS_M4_3-methylbuta-1,2-diene +CO                            | -307.942578    |
| TS_M4_1-butyne+CH <sub>2</sub> CO                           | -307.958898    |
| TS_M1_CA1                                                   | -307.983271    |
| TS_CA1_M2                                                   | -308.005649    |
| TS_CA1_B1                                                   | -307.970129    |
| TS_CA1_pC <sub>3</sub> H <sub>4</sub> +methylketene         | -307.970376    |
| TS_B1_propyne +methylketene                                 | -307.945083    |
| TS_B1_B3+CO                                                 | -307.954292    |
| TS_B3_C <sub>5</sub> H <sub>8</sub> -12                     | -307.936286    |
| TS_B3_C <sub>5</sub> H <sub>8</sub> -13                     | -307.960106    |
| TS_M1_B2                                                    | -307.983564    |
| TS_B2_M3                                                    | -307.983378    |
| TS_B2_M5                                                    | -307.968640    |
| TS_B2_M6                                                    | -307.982351    |
| TS_M5_M7                                                    | -308.047809    |
| TS_M6_C <sub>6</sub> H <sub>6</sub> +H <sub>2</sub> O       | -307.92204     |
| TS_M2_CA3                                                   | -307.997449    |
| TS_CA3_M9                                                   | -308.011074    |
| TS_M9_2-pentyne+CO                                          | -307.997254    |
| TS_CA3_M11                                                  | -307.974985    |
| TS_M2_CA4                                                   | -307.976863    |
| TS_CA4_M11                                                  | -308.000137    |
| TS_CA4_pC <sub>3</sub> H <sub>4</sub> +CH <sub>3</sub> CHCO | -307.964714    |

**Table S4: Isodesmic reactions used to compute the enthalpies of formation.**

Values on the first line below a given isodesmic reactions are enthalpies at 298 K (in Hartree) computed at the CBS-QB3 level of theory.

Experimental data (2nd line below each isodesmic reaction, in kcal mol<sup>-1</sup>) are taken from NIST chemistry webbook (<http://webbook.nist.gov/chemistry/>). If not known calculated at the CBS-QB3 level of theory with the atomization energy method.

|                     |            |              |                 |              |  |                     |
|---------------------|------------|--------------|-----------------|--------------|--|---------------------|
| <b>DMF (M1)</b>     |            |              |                 |              |  | <b>DMF</b>          |
| DMF +               | 2*CH4 =    | ethoxyethane | 1,3-butadiene   |              |  | DHf mean            |
| -308.104743         | -80.812346 | -233.20586   | -155.661311     | 31.3         |  | <b>-30.0</b>        |
|                     | -17.89     | -60.28       | 26              | <b>-29.8</b> |  |                     |
|                     |            |              |                 |              |  |                     |
| DMF +               | C2H6 =     | THF          | 1,3-butadiene   |              |  |                     |
| -308.104743         | -79.626126 | -232.017501  | -155.661311     | 32.7         |  |                     |
|                     | -20        | -44.03       | 26              | <b>-30.7</b> |  |                     |
|                     |            |              |                 |              |  |                     |
| DMF +               | CH4 =      | DME          | cyclopentadiene |              |  |                     |
| -308.104743         | -40.406173 | -154.746927  | -193.707639     | 35.4         |  |                     |
|                     | -17.89     | -43.99       | 31.89           | <b>-29.6</b> |  |                     |
|                     |            |              |                 |              |  |                     |
| DMF +               | C2H6 =     | Furan        | iC4H10          |              |  |                     |
| -308.104743         | -79.626126 | -229.63842   | -158.077841     | 9.2          |  |                     |
|                     | -20        | -8.3         | -32.42          | <b>-29.9</b> |  |                     |
| <b>DMF-2,4 (M2)</b> |            |              |                 |              |  | <b>DMF-2,4 (M2)</b> |
| DMF, 2-4 +          | 2*CH4 =    | ethoxyethane | 1,3-butadiene   |              |  | DHf mean            |
| -308.100721         | -80.812346 | -233.20586   | -155.661311     | 28.8         |  | <b>-27.5</b>        |
|                     | -17.89     | -60.28       | 26              | <b>-27.3</b> |  |                     |
|                     |            |              |                 |              |  |                     |
| DMF, 2-4 +          | C2H6 =     | THF          | 1,3-butadiene   |              |  |                     |
| -308.100721         | -79.626126 | -232.017501  | -155.661311     | 30.1         |  |                     |
|                     | -20        | -44.03       | 26              | <b>-28.2</b> |  |                     |
|                     |            |              |                 |              |  |                     |
| DMF, 2-4 +          | CH4 =      | DME          | cyclopentadiene |              |  |                     |
| -308.100721         | -40.406173 | -154.746927  | -193.707639     | 32.8         |  |                     |
|                     | -17.89     | -43.99       | 31.89           | <b>-27.0</b> |  |                     |
|                     |            |              |                 |              |  |                     |
| DMF, 2-4 +          | C2H6 =     | Furan        | iC4H10          |              |  |                     |
| -308.100721         | -79.626126 | -229.63842   | -158.077841     | 6.6          |  |                     |
|                     | -20        | -8.3         | -32.42          | <b>-27.4</b> |  |                     |

|                                      |            |                |                |             |  |                         |
|--------------------------------------|------------|----------------|----------------|-------------|--|-------------------------|
| <b>vinylcyclopropylcarbinyl (M3)</b> |            |                |                |             |  | <b>vinylcyclopropyl</b> |
| Dfurop +                             | CH4 =      | 2,3-pentadiene | acetaldehyde   |             |  | DHf mean                |
| -308.033251                          | -40.406173 | -194.869283    | -153.577614    | -4.7        |  | <b>14.2</b>             |
|                                      | -17.89     | 31.79          | -40.8          | <b>13.6</b> |  |                         |
|                                      |            |                |                |             |  |                         |
| Dfurop +                             | C2H6 =     | 2,3-pentadiene | acetone        |             |  |                         |
| -308.033251                          | -79.626126 | -194.869283    | -192.813157    | -14.5       |  |                         |
|                                      | -20        | 31.79          | -52.23         | <b>14.0</b> |  |                         |
|                                      |            |                |                |             |  |                         |
| Dfurop +                             | 2*CH4 =    | allene         | acetone + C2H6 |             |  |                         |
| -308.033251                          | -80.812346 | -116.415548    | -272.439283    | -5.8        |  |                         |
|                                      | -35.78     | 45.7           | -72.23         | <b>15.0</b> |  |                         |

| <b>dimethyl_furop (M4)</b> |            |                |                |             | <b>dimethyl_furop</b> |
|----------------------------|------------|----------------|----------------|-------------|-----------------------|
| Dfurop +                   | CH4 =      | 2,3-pentadiene | acetaldehyde   |             | DHf mean              |
| -308.056827                | -40.406173 | -194.869283    | -153.577614    | 10.1        | <b>-0.6</b>           |
|                            | -17.89     | 31.79          | -40.8          | <b>-1.2</b> |                       |
| Dfurop +                   | C2H6 =     | 2,3-pentadiene | acetone        |             |                       |
| -308.056827                | -79.626126 | -194.869283    | -192.813157    | 0.3         |                       |
|                            | -20        | 31.79          | -52.23         | <b>-0.8</b> |                       |
| Dfurop +                   | 2*CH4 =    | allene         | acetone + C2H6 |             |                       |
| -308.056827                | -80.812346 | -116.415548    | -272.439283    | 9.0         |                       |
|                            | -35.78     | 45.7           | -72.23         | <b>0.2</b>  |                       |

| <b>dimethyl_furop_13 (M5)</b> |            |                |                |              | <b>dimethyl_furop 1:</b> |
|-------------------------------|------------|----------------|----------------|--------------|--------------------------|
| Dfurop +                      | CH4 =      | 2,3-pentadiene | acetaldehyde   |              | DHf mean                 |
| -308.072087                   | -40.406173 | -194.869283    | -153.577614    | 19.7         | <b>-10.2</b>             |
|                               | -17.89     | 31.79          | -40.8          | <b>-10.8</b> |                          |
| Dfurop +                      | C2H6 =     | 2,3-pentadiene | acetone        |              |                          |
| -308.072087                   | -79.626126 | -194.869283    | -192.813157    | 9.9          |                          |
|                               | -20        | 31.79          | -52.23         | <b>-10.3</b> |                          |
| Dfurop +                      | 2*CH4 =    | allene         | acetone + C2H6 |              |                          |
| -308.072087                   | -80.812346 | -116.415548    | -272.439283    | 18.6         |                          |
|                               | -35.78     | 45.7           | -72.23         | <b>-9.4</b>  |                          |

| <b>CH2CCHCHC(OH)CH3 (M6)</b> |            |               |                    |             | <b>CH2CCHCHC(OH)</b> |
|------------------------------|------------|---------------|--------------------|-------------|----------------------|
| Dfurop +                     | 2*CH4 =    | 1,2-butadiene | ethanol + ethylene |             | DHf mean             |
| -308.037059                  | -80.812346 | -155.642326   | -233.17753         | 18.5        | <b>12.3</b>          |
|                              | -35.78     | 38.8          | -43.46             | <b>12.5</b> |                      |
| M6 +                         | 2*CH4 =    | allene        | ethanol + propene  |             |                      |
| -308.037059                  | -80.812346 | -116.415548   | -272.406059        | 17.4        |                      |
|                              | -35.78     | 45.7          | -51.121            | <b>12.9</b> |                      |
| M6 +                         | 2*CH4 =    | 1,2-butadiene | methanol + propene |             |                      |
| -308.037059                  | -80.812346 | -155.642326   | -233.176853        | 19.0        |                      |
|                              | -35.78     | 38.8          | -44.121            | <b>11.5</b> |                      |

| <b>C6H8O# (M7)</b> |            |              |                 |              | <b>C6H8O#</b> |
|--------------------|------------|--------------|-----------------|--------------|---------------|
| C6H8O# +           | 2*CH4 =    | ethoxyethane | 1,3-butadiene   |              | DHf mean      |
| -308.076159        | -80.812346 | -233.20586   | -155.661311     | 13.4         | <b>-12.1</b>  |
|                    | -17.89     | -60.28       | 26              | <b>-11.9</b> |               |
| C6H8O# +           | C2H6 =     | THF          | 1,3-butadiene   |              |               |
| -308.076159        | -79.626126 | -232.017501  | -155.661311     | 14.7         |               |
|                    | -20        | -44.03       | 26              | <b>-12.8</b> |               |
| C6H8O# +           | CH4 =      | DME          | cyclopentadiene |              |               |
| -308.076159        | -40.406173 | -154.746927  | -193.707639     | 17.4         |               |
|                    | -17.89     | -43.99       | 31.89           | <b>-11.6</b> |               |
| C6H8O# +           | C2H6 =     | Furan        | iC4H10          |              |               |
| -308.076159        | -79.626126 | -229.63842   | -158.077841     | -8.8         |               |
|                    | -20        | -8.3         | -32.42          | <b>-11.9</b> |               |

|             |             |                  |                      |             |             |
|-------------|-------------|------------------|----------------------|-------------|-------------|
| <b>M8</b>   |             |                  |                      |             | <b>M8</b>   |
| C6H6O       | 2*CH4 =     | divinylether     | 2-butene             |             | DHf mean    |
| -306.880407 | -80.812346  | -230.790263      | -156.869284          | 20.8        | <b>9.8</b>  |
|             | -35.78      | -3.03            | -2.58                | <b>9.3</b>  |             |
| <b>M9</b>   |             |                  |                      |             | <b>M9</b>   |
| C6H6O       | 2*CH4 =     | 1,3,5-hexatriene | DME                  |             | DHf mean    |
| -306.880407 | -80.812346  | -232.911445      | -154.746927          | 21.6        | <b>10.3</b> |
|             | -35.78      | 40.1             | -43.99               | <b>10.3</b> |             |
| <b>M9</b>   |             |                  |                      |             | <b>M9</b>   |
| C6H6O       | 3*CH4 =     | acetone          | 1,3-butadiene + C2H6 |             | DHf mean    |
| -306.902026 | -121.218519 | -192.813157      | -235.287437          | 12.5        | <b>-5.2</b> |
|             | -53.67      | -52.23           | 6                    | <b>-5.1</b> |             |
| <b>M9</b>   |             |                  |                      |             | <b>M9</b>   |
| C6H6O       | 3*CH4 =     | acetone          | 1,3-pentadiene       |             | DHf mean    |
| -306.902026 | -80.812346  | -192.813157      | -194.890151          | 6.9         | <b>-5.3</b> |
|             | -35.78      | -52.23           | 18.11                | <b>-5.3</b> |             |
| <b>M10</b>  |             |                  |                      |             | <b>M10</b>  |
| C6H6O       | 2*CH4 =     | 1,3,5-hexatriene | DME                  |             | DHf mean    |
| -306.861848 | -80.812346  | -232.911445      | -154.746927          | 9.9         | <b>21.5</b> |
|             | -35.78      | 40.1             | -43.99               | <b>22.0</b> |             |
| <b>M10</b>  |             |                  |                      |             | <b>M10</b>  |
| C6H6O       | 2*CH4 =     | divinylether     | 2-butene             |             | DHf mean    |
| -306.861848 | -80.812346  | -230.790263      | -156.869284          | 9.2         | <b>21.0</b> |
|             | -35.78      | -3.03            | -2.58                | <b>21.0</b> |             |

|                  |            |              |                 |              |                  |
|------------------|------------|--------------|-----------------|--------------|------------------|
| <b>DMF (M11)</b> |            |              |                 |              | <b>DMF (M11)</b> |
| DMF +            | 2*CH4 =    | ethoxyethane | 1,3-butadiene   |              | DHf mean         |
| -308.096962      | -80.812346 | -233.20586   | -155.661311     | 26.4         | <b>-25.1</b>     |
|                  | -17.89     | -60.28       | 26              | <b>-24.9</b> |                  |
| <b>DMF (M11)</b> |            |              |                 |              | <b>DMF (M11)</b> |
| DMF +            | C2H6 =     | THF          | 1,3-butadiene   |              | DHf mean         |
| -308.096962      | -79.626126 | -232.017501  | -155.661311     | 27.8         | <b>-25.8</b>     |
|                  | -20        | -44.03       | 26              | <b>-25.8</b> |                  |
| <b>DMF (M11)</b> |            |              |                 |              | <b>DMF (M11)</b> |
| DMF +            | CH4 =      | DME          | cyclopentadiene |              | DHf mean         |
| -308.096962      | -40.406173 | -154.746927  | -193.707639     | 30.5         | <b>-24.7</b>     |
|                  | -17.89     | -43.99       | 31.89           | <b>-24.7</b> |                  |
| <b>DMF (M11)</b> |            |              |                 |              | <b>DMF (M11)</b> |
| DMF +            | C2H6 =     | Furan        | iC4H10          |              | DHf mean         |
| -308.096962      | -79.626126 | -229.63842   | -158.077841     | 4.3          | <b>-25.0</b>     |
|                  | -20        | -8.3         | -32.42          | <b>-25.0</b> |                  |

| <b>alpha carbene (CA1)</b> |             |                     |                       |             | <b>alpha carbene</b> |
|----------------------------|-------------|---------------------|-----------------------|-------------|----------------------|
| alpha carbene +            | 4*CH4 =     | DME + propene +     | C4H10 + CH2(singulet) |             | DHf mean             |
| -308.009472                | -161.624692 | -272.388104         | -197.131379           | 72.0        | <b>30.8</b>          |
|                            | -71.56      | -39.111             | 70.34                 | <b>30.8</b> |                      |
| alpha carbene +            | 2*CH4 =     | THF + CH2(singulet) | propene               |             |                      |
| -308.009472                | -80.812346  | -271.071039         | -117.641177           | 68.8        |                      |
|                            | -35.78      | 58.73               | 4.879                 | <b>30.6</b> |                      |
| alpha carbene +            | 3*CH4 =     | ethoxyethane + CH2  | 1-butene              |             |                      |
| -308.009472                | -121.218519 | -272.259398         | -156.86502            | 65.0        |                      |
|                            | -53.67      | 42.48               | -0.15                 | <b>31.0</b> |                      |

| <b>beta carbene (CA2)</b> |             |                     |                       |             | <b>beta carbene (CA2)</b> |
|---------------------------|-------------|---------------------|-----------------------|-------------|---------------------------|
| beta carbene +            | 4*CH4 =     | DME + propene +     | C4H10 + CH2(singulet) |             | DHf mean                  |
| -308.010862               | -161.624692 | -272.388104         | -197.131379           | 72.8        | <b>29.9</b>               |
|                           | -71.56      | -39.111             | 70.34                 | <b>30.0</b> |                           |
| beta carbene +            | 2*CH4 =     | THF + CH2(singulet) | propene               |             |                           |
| -308.010862               | -80.812346  | -271.071039         | -117.641177           | 69.6        |                           |
|                           | -35.78      | 58.73               | 4.879                 | <b>29.7</b> |                           |
| beta carbene +            | 3*CH4 =     | ethoxyethane + CH2  | 1-butene              |             |                           |
| -308.010862               | -121.218519 | -272.259398         | -156.86502            | 65.9        |                           |
|                           | -53.67      | 42.48               | -0.15                 | <b>30.1</b> |                           |

| <b>alpha carbene (CA3)</b> |             |                     |                       |             | <b>alpha carbene (CA3)</b> |
|----------------------------|-------------|---------------------|-----------------------|-------------|----------------------------|
| alpha carbene +            | 4*CH4 =     | DME + propene +     | C4H10 + CH2(singulet) |             | DHf mean                   |
| -308.0025917               | -161.624692 | -272.388104         | -197.131379           | 67.6        | <b>35.1</b>                |
|                            | -71.56      | -39.111             | 70.34                 | <b>35.1</b> |                            |
| alpha carbene +            | 2*CH4 =     | THF + CH2(singulet) | propene               |             |                            |
| -308.0025917               | -80.812346  | -271.071039         | -117.641177           | 64.5        |                            |
|                            | -35.78      | 58.73               | 4.879                 | <b>34.9</b> |                            |
| alpha carbene +            | 3*CH4 =     | ethoxyethane + CH2  | 1-butene              |             |                            |
| -308.0025917               | -121.218519 | -272.259398         | -156.86502            | 60.7        |                            |
|                            | -53.67      | 42.48               | -0.15                 | <b>35.3</b> |                            |

| <b>alpha carbene (CA4)</b> |             |                     |                       |             | <b>alpha carbene (CA4)</b> |
|----------------------------|-------------|---------------------|-----------------------|-------------|----------------------------|
| alpha carbene +            | 4*CH4 =     | DME + propene +     | C4H10 + CH2(singulet) |             | DHf mean                   |
| -308.004771                | -161.624692 | -272.388104         | -197.131379           | 69.0        | <b>33.8</b>                |
|                            | -71.56      | -39.111             | 70.34                 | <b>33.8</b> |                            |
| alpha carbene +            | 2*CH4 =     | THF + CH2(singulet) | propene               |             |                            |
| -308.004771                | -80.812346  | -271.071039         | -117.641177           | 65.8        |                            |
|                            | -35.78      | 58.73               | 4.879                 | <b>33.6</b> |                            |
| alpha carbene +            | 3*CH4 =     | ethoxyethane + CH2  | 1-butene              |             |                            |
| -308.004771                | -121.218519 | -272.259398         | -156.86502            | 62.0        |                            |
|                            | -53.67      | 42.48               | -0.15                 | <b>34.0</b> |                            |



| <b>birad_alpha_c (B1)</b> |              |              |                 |             | <b>birad_alpha_c</b> |
|---------------------------|--------------|--------------|-----------------|-------------|----------------------|
| birad_alpha_c+            | 3*CH4 =      | CHO + C2H3   | iC4H10 + C2H6   |             | DHf mean             |
| -307.9610634              | -121.218519  | -191.439892  | -237.703967     | 22.4        | <b>59.9</b>          |
|                           | -53.67       | 81.4         | -52.42          | <b>60.2</b> |                      |
| birad_alpha_c+            | 2*CH4 =      | C2H3O + C2H3 | iC4H10          |             |                      |
| -307.961063               | -80.812346   | -230.676066  | -158.077841     | 12.2        |                      |
|                           | -35.78       | 68.1         | -32.42          | <b>59.2</b> |                      |
| birad_alpha_c+            | 2*CH4 =      | CHO + C2H3   | 2-methyl-butane |             |                      |
| -307.961063               | -80.812346   | -191.439892  | -197.301421     | 20.1        |                      |
|                           | -35.78       | 81.4         | -36.73          | <b>60.3</b> |                      |
| <b>birad_C5 (B3)</b>      |              |              |                 |             | <b>birad_C5</b>      |
| birad_C5                  | 2*CH4 =      | iC3H7 + C2H3 | C2H6            |             | DHf mean             |
| -194.787313               | -80.812346   | -195.934173  | -79.626126      | 24.7        | <b>83.4</b>          |
|                           | -35.78       | 93           | -20             | <b>84.1</b> |                      |
| birad_C5                  | CH4 + C2H4 = | C3H5 + C2H3  | propane         |             |                      |
| -194.787313               | -118.818821  | -194.743654  | -118.850345     | 0.0         |                      |
|                           | -5.35        | 111.9        | -25.02          | <b>92.2</b> |                      |
| birad_C5                  | 2*CH4 =      | C2H3 + C2H5  | propane         |             |                      |
| -194.787313               | -80.812346   | -156.705551  | -118.850345     | 27.5        |                      |
|                           | -35.78       | 99.4         | -25.02          | <b>82.7</b> |                      |

| <b>DMF_birad (B2)</b> |             |                   |                       |             | <b>DMF_birad (B2)</b> |
|-----------------------|-------------|-------------------|-----------------------|-------------|-----------------------|
| birad_alpha_c+        | 3*CH4 =     | CHO + C2H3        | iC4H10 + C2H6         |             | DHf mean              |
| -307.9759698          | -121.218519 | -191.439892       | -237.703967           | 31.8        | <b>50.7</b>           |
|                       | -53.67      | 81.4              | -52.42                | <b>50.9</b> |                       |
| birad_alpha_c+        | 2*CH4 =     | i-propenyl + C2H6 | CH3COCH2              |             |                       |
| -307.9759698          | -80.812346  | -196.598449       | -192.162382           | 17.2        |                       |
|                       | -35.78      | 40.4              | -8.6                  | <b>50.3</b> |                       |
| birad_alpha_c+        | 2*CH4 =     | CHO + C2H3        | 2-methyl-butane       |             |                       |
| -307.9759698          | -80.812346  | -191.439892       | -197.301421           | 29.5        |                       |
|                       | -35.78      | 81.4              | -36.73                | <b>51.0</b> |                       |
| birad_alpha_c+        | 2*CH4 =     | acetone           | C4H10 + CH2(singulet) |             |                       |
| -307.9759698          | -80.812346  | -192.813157       | -195.918558           | 35.5        |                       |
|                       | -35.78      | -52.23            | 102.61                | <b>50.6</b> |                       |

| <b>DMF_RY (R1)</b> |             |             |             |            | <b>DMF_RY (R1)</b> |
|--------------------|-------------|-------------|-------------|------------|--------------------|
| C6H7O              | CH4 =       | furan       | n-propyl    |            | DHf mean           |
| -307.471026        | -40.406173  | -229.63842  | -118.189706 | 30.8       | <b>2.7</b>         |
|                    | -17.89      | -8.23       | 23.9        | <b>2.8</b> |                    |
| C6H7O              | 2*CH4 =     | furan       | C2H6 + C2H5 |            |                    |
| -307.471026        | -80.812346  | -229.63842  | -158.592742 | 32.8       |                    |
|                    | -35.78      | -8.23       | 8.4         | <b>3.2</b> |                    |
| C6H7O              | 3*CH4 =     | CH3OCH3     | C3H7 + C4H6 |            |                    |
| -307.471026        | -121.218519 | -154.746927 | -273.851017 | 57.5       |                    |
|                    | -53.67      | -43.99      | 49.9        | <b>2.1</b> |                    |

| <b>M2-R1</b> |             |             |             |            |  | <b>M2-R1</b> |
|--------------|-------------|-------------|-------------|------------|--|--------------|
| C6H7O        | CH4 =       | furan       | n-propyl    |            |  | DHf mean     |
| -307.466152  | -40.406173  | -229.63842  | -118.189706 | 27.7       |  | <b>5.7</b>   |
|              | -17.89      | -8.23       | 23.9        | <b>5.8</b> |  |              |
| C6H7O        | 2*CH4 =     | furan       | C2H6 + C2H5 |            |  |              |
| -307.466152  | -80.812346  | -229.63842  | -158.592742 | 29.7       |  |              |
|              | -35.78      | -8.23       | 8.4         | <b>6.2</b> |  |              |
| C6H7O        | 3*CH4 =     | CH3OCH3     | C3H7+C4H6   |            |  |              |
| -307.466152  | -121.218519 | -154.746927 | -273.851017 | 54.4       |  |              |
|              | -53.67      | -43.99      | 49.9        | <b>5.2</b> |  |              |

| <b>M2-R2</b> |             |             |             |             |  | <b>M2-R2</b> |
|--------------|-------------|-------------|-------------|-------------|--|--------------|
| C6H7O        | CH4 =       | furan       | n-propyl    |             |  | DHf mean     |
| -307.459947  | -40.406173  | -229.63842  | -118.189706 | 23.8        |  | <b>9.6</b>   |
|              | -17.89      | -8.23       | 23.9        | <b>9.7</b>  |  |              |
| C6H7O        | 2*CH4 =     | furan       | C2H6 + C2H5 |             |  |              |
| -307.459947  | -80.812346  | -229.63842  | -158.592742 | 25.8        |  |              |
|              | -35.78      | -8.23       | 8.4         | <b>10.1</b> |  |              |
| C6H7O        | 3*CH4 =     | CH3OCH3     | C3H7+C4H6   |             |  |              |
| -307.459947  | -121.218519 | -154.746927 | -273.851017 | 50.5        |  |              |
|              | -53.67      | -43.99      | 49.9        | <b>9.1</b>  |  |              |

**Table S5: High-pressure limit rate expressions for DMF decomposition pathways (reverse direction), with tight transition state structures on the PES, computed using CBS-QB3 and TST/HR/Eckart methods.**

| Reaction  | $k_{\infty} = A T^n e^{-E/RT}$ |        |       | T (K)      |
|-----------|--------------------------------|--------|-------|------------|
|           | A                              | n      | E     |            |
| M1 ⇌ CA2  | $2.25 \times 10^{11}$          | 0.458  | 8816  | 500 - 2000 |
| CA2 ⇌ M4  | $9.94 \times 10^{10}$          | -0.046 | 30892 | 500 - 2000 |
| CA2 ⇌ M2  | $1.48 \times 10^{11}$          | 0.772  | 82474 | 500 - 2000 |
| M1 ⇌ CA1  | $5.16 \times 10^{10}$          | 0.600  | 20658 | 500 - 2000 |
| CA1 ⇌ M2  | $2.37 \times 10^{12}$          | 0.272  | 7795  | 500 - 2000 |
| CA1 ⇌ B1  | $4.70 \times 10^{09}$          | 0.342  | 610   | 500 - 2000 |
| M1 ⇌ B2   | $3.15 \times 10^{12}$          | 0.091  | 1973  | 500 - 2000 |
| B2 ⇌ M3   | $7.73 \times 10^{11}$          | 0.144  | 37848 | 500 - 2000 |
| B2 ⇌ M5   | $1.90 \times 10^{11}$          | 0.611  | 70510 | 500 - 2000 |
| B2 ⇌ M6   | $7.18 \times 10^{11}$          | 0.095  | 39695 | 500 - 2000 |
| M3 ⇌ M2   | $4.93 \times 10^{10}$          | 1.471  | 83667 | 500 - 2000 |
| M5 ⇌ M7   | $2.06 \times 10^{12}$          | 0.260  | 22672 | 500 - 2000 |
| M2 ⇌ CA3  | $4.32 \times 10^{11}$          | 0.244  | 7016  | 500 - 2000 |
| CA3 ⇌ M9  | $2.94 \times 10^{09}$          | 0.421  | 30504 | 500 - 2000 |
| CA3 ⇌ M11 | $1.54 \times 10^{11}$          | 0.786  | 82578 | 500 - 2000 |
| M2 ⇌ CA4  | $1.57 \times 10^{11}$          | 0.382  | 21617 | 500 - 2000 |
| CA4 ⇌ M11 | $4.71 \times 10^{11}$          | 0.686  | 66425 | 500 - 2000 |

**Table S6: NASA polynomials and reaction mechanism in CHEMKIN format.**

```
! Please cite this work as
! Unimolecular decomposition of 2,5-dimethylfuran: a theoretical study
! B. Sirjean and R. Fournet, PCCP, x, xx-xx, 2012
!
!
! *****
!           MECHANISM OF DMF
! *****
! Detailed chemical structures can be found in PES schemes
!
!
ELEMENTS
H O C AR
END

SPECIES

!*DMF initiation species !
M1      ! 2,5-DMF
R1C6H7O      ! C6H7O
R1H
CA2
M4      ! ch3/ch//c//ch/c(/ch3)//o
C4H5-1s      ! ch///c/ch(/)/ch3
R14CH3CO      ! .c(/o)/ch3
M2      ! 2,4-DMF
CA3
CA4
M8
M9
M10
M11
M2-R1
M2-R2
CH2COZ
C4H6-12
C5H8-23
C5H8-2
C5H7-2s
B2CO
CH3CH3CHCCH
C4H6-1
CA1
B1
M3
M5
M6
M7
pC3H4      !ch///c/ch3
B2
B3
C5H8      ! ch2//ch/ch2/ch//ch2      1,3-pentadiene
CH3CHCO
C5H8-12      ! ch2//c//ch/ch2/ch3
C6H6-12      ! ch2//c//ch/ch//c//ch2
H2O
R5CHO
M5F-2yl
```

R4CH3  
nC4H5  
M6-RY  
R2OH  
C4H4  
AR

EnD

THERMO ALL

300.000 1000.000 5000.000

!\*Especies añadidas\*!

R1H 16/94H 1 0 0 0g 200.000 6000.00 1000.00 1  
0.25000000e+01 0.00000000e+00 0.00000000e+00 0.00000000e+00 0.00000000e+00 2  
0.25473660e+05 -0.44668285e+00 0.25000000e+01 0.00000000e+00 0.00000000e+00 3  
0.00000000e+00 0.00000000e+00 0.25473660e+05 -0.44668285e+00 0.26219035e+05 4  
H2O 15/89H 2 O 1 0 0g 200.000 6000.00 1000.00 1  
0.26770389e+01 0.29731816e-02 -0.77376889e-06 0.94433514e-10 -0.42689991e-14 2  
-0.29885894e+05 0.68825500e+01 0.41986352e+01 -0.20364017e-02 0.65203416e-05 3  
-0.54879269e-08 0.17719680e-11 -0.30293726e+05 -0.84900901e+00 -0.29084817e+05 4  
AR g 5/97AR 1 0 0 0g 200.000 6000.00 1000.00 1  
2.50000000e+00 0.00000000e+00 0.00000000e+00 0.00000000e+00 0.00000000e+00 2  
-7.45375000e+02 4.37967491e+00 2.50000000e+00 0.00000000e+00 0.00000000e+00 3  
0.00000000e+00 0.00000000e+00 -7.45375000e+02 4.37967491e+00 0.00000000e+00 4  
B2CO rus 79C 1 O 1 0 0g 200.000 6000.00 1000.00 1  
0.30484859e+01 0.13517281e-02 -0.48579405e-06 0.78853644e-10 -0.46980746e-14 2  
-0.14266117e+05 0.60170977e+01 0.35795335e+01 -0.61035369e-03 0.10168143e-05 3  
0.90700586e-09 -0.90442449e-12 -0.14344086e+05 0.35084093e+01 -0.13293628e+05 4  
R14CH3CO iu2/03C 2 H 3 O 1 0g 200.000 6000.00 1000.00 1  
0.53137165e+01 0.91737793e-02 -0.33220386e-05 0.53947456e-09 -0.32452368e-13 2  
-0.36450414e+04 -0.16757558e+01 0.40358705e+01 0.87729487e-03 0.30710010e-04 3  
-0.39247565e-07 0.15296869e-10 -0.26820738e+04 0.78617682e+01 -0.12388039e+04 4  
CH2COZ g 4/02C 2 H 2 O 1 0g 200.000 6000.00 1000.00 1  
5.75871449e+00 6.35124053e-03 -2.25955361e-06 3.62321512e-10 -2.15855515e-14 2  
-8.08533464e+03 -4.96490444e+00 2.13241136e+00 1.81319455e-02 -1.74093315e-05 3  
9.35336040e-09 -2.01724844e-12 -7.14808520e+03 1.33807969e+01 -5.84267744e+03 4  
pC3H4 t 2/90H 4 C 3 0 0g 200.000 6000.00 1000.00 1  
0.60252400e+01 0.11336542e-01 -0.40223391e-05 0.64376063e-09 -0.38299635e-13 2  
0.19620942e+05 -0.86043785e+01 0.26803869e+01 0.15799651e-01 0.25070596e-05 3  
-0.13657623e-07 0.66154285e-11 0.20802374e+05 0.98769351e+01 0.22302059e+05 4  
C4H5-1s H 5C 4 0 0g 300.00 5000.00 1000.00 1 BS-CBSQB3  
7.69293940E+00 1.54258422E-02 -5.90706254E-06 1.04195983E-09 -6.93720612E-14 2  
3.51003630E+04 -1.31002920E+01 1.61027097E+00 3.28109340E-02 -2.45693748E-05 3  
9.62797991E-09 -1.32525965E-12 3.68073742E+04 1.83050762E+01 4  
C4H6-12 OC 4H 6 G 0300.00 5000.00 1000.00 1  
.88417616E+01 .15843917E-01 -.53288832E-05 .83887475E-09 -.50956042E-13 2  
.15358018E+05 -.21569241E+02 .13161099E+01 .32781690E-01 -.17367984E-04 3  
.31549054E-08 .24441525E-12 .17789736E+05 .18652039E+02 4  
C4H6-1 OC 4H 6 G 0300.00 5000.00 1000.00 1  
0.83276472E+01 0.16502315E-01 -0.56312797E-05 0.89907620E-09 -0.55341236E-13 2  
0.16017064E+05 -0.18720215E+02 0.14775175E+01 0.33041432E-01 -0.18198547E-04 3  
0.32913221E-08 0.41783853E-12 0.18094027E+05 0.17427605E+02 4  
C5H8 C 5H 8O 0 G 0300.00 5000.00 1000.00 1  
0.11670992E+02 0.23878116E-01 -0.88798688E-05 0.15070004E-08 -0.96833511E-13 2  
0.29606875E+04 -0.38388065E+02 0.36735153E+01 0.31901374E-01 -0.40754057E-05 3  
-0.44839923E-08 0.10373115E-11 0.66159673E+04 0.81445122E+01 4  
CH3CHCO H 4C 3O 1 0g 300.00 5000.00 1000.00 1  
6.41142736E+00 1.41180512E-02 -5.47884915E-06 9.75510219E-10 -6.53860403E-14 2  
-1.12002860E+04 -6.98716513E+00 2.51775679E+00 1.97247469E-02 -9.91194448E-07 3

-1.03311292E-08 5.01227079E-12-9.80356352E+03 1.45477165E+01 4  
C5H8-12 C 5H 8O 0 G 0300.00 5000.00 1000.00 1  
0.11842818E+02 0.20301070E-01-0.67252231E-05 0.10506498E-08-0.63661506E-13 2  
0.11569117E+05-0.36193130E+02 0.63297063E+00 0.46450026E-01-0.26112299E-04 3  
0.50091677E-08 0.41070825E-12 0.15082342E+05 0.23348232E+02 4  
!\*DMF UNIMOLECULAR INITIATION MECHANISM\* (CBSQB3)!

M1 H 8C 6O 1 0g 300.00 5000.00 1000.00 1  
1.17792073E+01 2.85086757E-02-1.11333319E-05 1.99173491E-09-1.33982691E-13 2  
-2.11130695E+04-3.67325928E+01 8.03526924E-01 4.43305994E-02 4.19434117E-06 3  
-3.49560899E-08 1.65826978E-11-1.72836857E+04 2.37121051E+01 4

M2 H 8C 6O 1 0g 300.00 5000.00 1000.00 1  
1.17507214E+01 2.85323202E-02-1.11416636E-05 1.99310905E-09-1.34069370E-13 2  
-1.98398788E+04-3.65534702E+01 9.81305762E-01 4.35634382E-02 5.29256086E-06 3  
-3.56109186E-08 1.67166549E-11-1.60529620E+04 2.28891553E+01 4

M3 H 8C 6O 1 0g 300.00 5000.00 1000.00 1  
1.33637948E+01 2.66475885E-02-1.04353326E-05 1.87050464E-09-1.26004554E-13 2  
7.79505289E+02-4.03490571E+01 2.20408315E+00 4.54691495E-02-3.65339547E-06 3  
-2.60382230E-08 1.32832060E-11 4.54429462E+03 2.04549946E+01 4

M4 H 8C 6O 1 0g 300.00 5000.00 1000.00 1  
1.31123130E+01 2.70313492E-02-1.06211461E-05 1.90792098E-09-1.28711095E-13 2  
-6.55772052E+03-3.82463856E+01 3.36118275E+00 4.09374257E-02 1.79956683E-06 3  
-2.81171725E-08 1.32619168E-11-3.09098365E+03 1.56332033E+01 4

M5 H 8C 6O 1 0g 300.00 5000.00 1000.00 1  
1.34841494E+01 2.75330271E-02-1.10218444E-05 2.00315143E-09-1.36182468E-13 2  
-1.17105735E+04-4.26388201E+01 1.31598715E+00 4.83574977E-02-5.70561360E-06 3  
-2.51806416E-08 1.30096836E-11-7.58148485E+03 2.36822304E+01 4

M6 H 8C 6O 1 0g 300.00 5000.00 1000.00 1  
1.45828789E+01 2.64245517E-02-1.05619757E-05 1.91683361E-09-1.30156786E-13 2  
-5.05932212E+02-4.90023566E+01 1.02464106E+00 6.19095416E-02-4.29604761E-05 3  
1.23389598E-08-1.45838728E-13 3.48728924E+03 2.18751820E+01 4

M7 H 8C 6O 1 0g 300.00 5000.00 1000.00 1  
1.19191145E+01 2.89417030E-02-1.13280633E-05 2.02982515E-09-1.36703699E-13 2  
-1.22651167E+04-3.84602626E+01-1.46577596E+00 5.47640541E-02-1.25343839E-05 3  
-2.22277640E-08 1.28296891E-11-7.93858593E+03 3.35998913E+01 4

B1 H 8C 6O 1 0g 300.00 5000.00 1000.00 1  
1.33151102E+01 2.59331531E-02-1.00721885E-05 1.79442506E-09-1.20329254E-13 2  
2.40892087E+04-3.65954916E+01 3.12513494E+00 4.97413502E-02-2.50097914E-05 3  
-9.36720293E-10 3.87705127E-12 2.72211969E+04 1.73463453E+01 4

B2 H 8C 6O 1 0g 300.00 5000.00 1000.00 1  
1.28206882E+01 2.75323852E-02-1.07507929E-05 1.92287141E-09-1.29319876E-13 2  
1.92845044E+04-3.72127261E+01 2.01893495E+00 4.69414201E-02-8.16937445E-06 3  
-2.06827232E-08 1.12307238E-11 2.28819680E+04 2.13761859E+01 4

B3 H 8C 5 0 0g 300.00 5000.00 1000.00 1  
9.11031421E+00 2.52020877E-02-9.79174291E-06 1.74487806E-09-1.17026079E-13 2  
3.72747279E+04-2.01230216E+01 3.30831606E+00 2.62103782E-02 2.02169381E-05 3  
-4.03405157E-08 1.67057182E-11 3.97102828E+04 1.37465455E+01 4

CA1 H 8C 6O 1 0g 300.00 5000.00 1000.00 1  
1.23306693E+01 2.80240728E-02-1.09529356E-05 1.96050516E-09-1.31929906E-13 2  
9.32988826E+03-3.81797710E+01 2.78627324E-01 4.93474491E-02-5.90684405E-06 3  
-2.65692544E-08 1.40238496E-11 1.33200215E+04 2.71740101E+01 4

CA2 H 8C 6O 1 0g 300.00 5000.00 1000.00 1  
1.23133588E+01 2.80184801E-02-1.09451726E-05 1.95844831E-09-1.31760417E-13 2  
8.89644693E+03-3.83243476E+01 1.24423624E+00 4.42064645E-02 4.15421950E-06 3  
-3.52595594E-08 1.68122366E-11 1.27346870E+04 2.25474617E+01 4

CA3 H 8C 6O 1 0g 300.00 5000.00 1000.00 1  
1.27535134E+01 2.75926049E-02-1.07755774E-05 1.92766128E-09-1.29666561E-13 2  
1.13998405E+04-4.12733622E+01-1.08306245E-01 5.40661393E-02-1.68761742E-05 3  
-1.63749091E-08 1.06054010E-11 1.54680604E+04 2.75440298E+01 4

CA4 H 8C 6O 1 0g 300.00 5000.00 1000.00 1  
1.28834121E+01 2.74572273E-02-1.07191821E-05 1.91712376E-09-1.28935791E-13 2

1.07163787E+04-4.22845144E+01-5.70616201E-01 5.74137942E-02-2.40114660E-05 3  
-1.00222579E-08 8.54387788E-12 1.48543585E+04 2.91312370E+01 4  
M8 H 8C 6O 1 0g 300.00 5000.00 1000.00 1  
1.30940321E+01 2.70668478E-02-1.06381992E-05 1.91121139E-09-1.28938139E-13 2  
-9.66634020E+03-3.90615283E+01 4.50668767E+00 3.70419329E-02 6.44721856E-06 3  
-3.02434093E-08 1.34931046E-11-6.46658909E+03 9.02966777E+00 4  
M9 H 8C 6O 1 0g 300.00 5000.00 1000.00 1  
1.24882547E+01 2.72876138E-02-1.06282017E-05 1.89722017E-09-1.27402263E-13 2  
-3.80531390E+03-3.45384663E+01 4.97218317E+00 3.66390872E-02 2.27566706E-06 3  
-2.40782839E-08 1.10525259E-11-1.02608202E+03 7.41961634E+00 4  
M10 H 8C 6O 1 0g 300.00 5000.00 1000.00 1  
1.28232691E+01 2.69286711E-02-1.04786729E-05 1.86950311E-09-1.25498608E-13 2  
2.43543735E+03-3.78896146E+01 3.16622256E+00 4.53189015E-02-1.20463104E-05 3  
-1.36966975E-08 8.21981588E-12 5.62489099E+03 1.42939047E+01 4  
M11 H 8C 6O 1 0g 300.00 5000.00 1000.00 1  
1.16869998E+01 2.85998756E-02-1.11700254E-05 1.99842771E-09-1.34438836E-13 2  
-1.86127851E+04-3.69189335E+01 1.14318272E+00 4.25878992E-02 7.01478405E-06 3  
-3.68831247E-08 1.70604054E-11-1.48629576E+04 2.14728446E+01 4  
M2-R1 H 7C 6O 1 0g 300.00 5000.00 1000.00 1  
1.30090495E+01 2.48947836E-02-9.70014700E-06 1.73295559E-09-1.16472648E-13 2  
-3.35111230E+03-4.31839441E+01-2.69237141E+00 6.70957584E-02-4.69210672E-05 3  
1.02196595E-08 2.06604905E-12 1.08153055E+03 3.82920737E+01 4  
M2-R2 H 7C 6O 1 0g 300.00 5000.00 1000.00 1  
1.30398982E+01 2.48568566E-02-9.68256240E-06 1.72942599E-09-1.16215349E-13 2  
-1.37430577E+03-4.38451493E+01-2.28783752E+00 6.58741864E-02-4.56091112E-05 3  
9.71124081E-09 2.08683992E-12 2.96724364E+03 3.57492988E+01 4  
C6H6-12 H 6C 6 0 0g 300.00 5000.00 1000.00 1  
1.17706113E+01 2.11906643E-02-8.43097565E-06 1.52510194E-09-1.03312403E-13 2  
4.39076061E+04-3.53687917E+01-4.43262542E-01 5.80795781E-02-5.19869371E-05 3  
2.52558507E-08-5.00425477E-12 4.72281909E+04 2.71877035E+01 4  
C5H8-23 H 8C 5 0 0g 300.00 5000.00 1000.00 1  
8.44234973E+00 2.56818914E-02-9.93780670E-06 1.76575984E-09-1.18174566E-13 2  
1.15651827E+04-1.81226866E+01 3.65389040E+00 2.44799076E-02 2.03843373E-05 3  
-3.82363172E-08 1.55042186E-11 1.37075297E+04 1.04053327E+01 4  
CH3CH3CHCCH H 8C 5 0 0g 300.00 5000.00 1000.00 1  
9.99582553E+00 2.38590599E-02-9.13194455E-06 1.61003258E-09-1.07148556E-13 2  
1.16521359E+04-2.69761721E+01-1.70019175E-01 5.51860509E-02-4.68546903E-05 3  
2.23696197E-08-4.35068583E-12 1.43745270E+04 2.49068018E+01 4  
C5H8-2 H 8C 5 0 0g 300.00 5000.00 1000.00 1  
8.42290060E+00 2.56714782E-02-9.92432837E-06 1.76201975E-09-1.17853297E-13 2  
1.11526191E+04-1.70327524E+01 2.59065423E+00 3.18378369E-02 3.53243783E-06 3  
-2.22443618E-08 1.00485663E-11 1.33694642E+04 1.58032032E+01 4  
C5H7-2s H 7C 5 0 0g 300.00 5000.00 1000.00 1  
8.44671959E+00 2.29551946E-02-8.90207783E-06 1.58412956E-09-1.06133533E-13 2  
2.93668575E+04-1.50768524E+01 3.18158136E+00 2.73126385E-02 6.78819210E-06 3  
-2.36021784E-08 1.02525556E-11 3.14342405E+04 1.48804602E+01 4  
R5CHO t 5/03C 1H 1O 1 0g 200.000 6000.00 1000.00 1  
3.92001542e+00 2.52279324e-03-6.71004164e-07 1.05615948e-10-7.43798261e-15 2  
3.65342928e+03 3.58077056e+00 4.23754610e+00-3.32075257e-03 1.40030264e-05 3  
-1.34239995e-08 4.37416208e-12 3.87241185e+03 3.30834869e+00 5.08749163e+03 4  
R1C6H7O H 7C 6O 1 0g 300.00 5000.00 1000.00 1  
1.31102927E+01 2.47948072E-02-9.65974341E-06 1.72554291E-09-1.15964578E-13 2  
-4.87490895E+03-4.38217815E+01-2.28163642E+00 6.56313207E-02-4.44613399E-05 3  
8.22249915E-09 2.69246635E-12-5.03625687E+02 3.61780235E+01 4  
R4CH3 iu0702C 1H 3 0 0g 200.000 6000.00 1000.00 1  
0.29781206e+01 0.57978520e-02-0.19755800e-05 0.30729790e-09-0.17917416e-13 2  
0.16509513e+05 0.47224799e+01 0.36571797e+01 0.21265979e-02 0.54583883e-05 3  
-0.66181003e-08 0.24657074e-11 0.16422716e+05 0.16735354e+01 0.17643935e+05 4  
M5F-2yl H 5C 5O 1 0g 300.00 5000.00 1000.00 1  
1.03070859E+01 1.91794860E-02-7.52851023E-06 1.35195389E-09-9.12029925E-14 2

```
1.92715511E+04-2.87359352E+01-5.22268588E-01 4.23154373E-02-1.47179134E-05 3
-1.23095218E-08 8.41272608E-12 2.26298547E+04 2.89402452E+01 4
nC4H5 C 4H 5O 0 G 0300.00 5000.00 1000.00 1
0.87693729E+01 0.12676305E-01-0.35977159E-05 0.50347698E-09-0.28290782E-13 2
0.38532445E+05-0.19949425E+02-0.11109806E+01 0.46597324E-01-0.45865116E-04 3
0.23767367E-07-0.50623750E-11 0.40732270E+05 0.29018211E+02 4
M6-RY H 7C 6O 1 0g 300.00 5000.00 1000.00 1
1.49481203E+01 2.30376767E-02-8.84552512E-06 1.56432152E-09-1.04384729E-13 2
1.45064529E+04-5.04446617E+01-1.59090232E+00 7.69197742E-02-7.70967331E-05 3
4.10522697E-08-8.73094312E-12 1.86941651E+04 3.30235400E+01 4
R2OH iu3/03O 1H 1 0 0g 200.000 6000.00 1000.00 1
2.83853033e+00 1.10741289e-03-2.94000209e-07 4.20698729e-11-2.42289890e-15 2
3.69780808e+03 5.84494652e+00 3.99198424e+00-2.40106655e-03 4.61664033e-06 3
-3.87916306e-09 1.36319502e-12 3.36889836e+03-1.03998477e-01 4.48613328e+03 4
C4H4 OC 4H 4 G 0300.00 5000.00 1000.00 1
0.63549404E+01 0.15122039E-01-0.57226539E-05 0.98267505E-09-0.63638168E-13 2
0.33896547E+05-0.74671631E+01 0.15192467E+01 0.29964752E-01-0.19455949E-04 3
0.39837320E-08 0.64256348E-12 0.34997141E+05 0.16783657E+02 4
END
```

## REACTIONS

```
!
!
!*****!
!* unimolecular initiation from CBS-QB3 calculations !
!*****!
! initial C-H bond fission
!
!R1C6H7O+R1H=M1 6.55E13 0.070 -51.5 ! Harding et al.
M1=>R1C6H7O+R1H 2.37E+15 0.070 85698.2 ! reverse from combination
!M5F-2yl+R4CH3=M1 1.38E+13 0.000 45.7 ! C6H5#+CH3 NIST (Lin)
M1=>M5F-2yl+R4CH3 2.60E+16 0.000 110532.08 ! reverse from combination
!
! H transfer
!
M1=CA2 4.93E+11 0.659 68712.0 !CBS-QB3 500-2000K k inf!
CA2=M4 5.73E+12 0.755 756.0 !CBS-QB3 500-2000K k inf!
CA2=M2 7.36E+10 0.561 25093.0 !CBS-QB3 500-2000K k inf!
!
!
! CH3 transfer scheme
!
M1=CA1 1.31E+11 0.815 81420.0 !CBS-QB3 500-2000K k inf!
CA1=>CH3CHCO+pC3H4 8.52E+13 0.321 31670.0 !CBS-QB3 500-2000K k inf!
CA1=M2 1.02E+12 0.272 7795.0 !CBS-QB3 500-2000K k inf!
CA1=B1 4.69E+13 0.015 30862.0 !CBS-QB3 500-2000K k inf!
B1=>CH3CHCO+pC3H4 1.67E+13 0.115 10853.0 !CBS-QB3 500-2000K k inf!
B1=>B3+B2CO 3.61E+13 0.155 10537.0 !CBS-QB3 500-2000K k inf!
B3=C5H8 7.30E+05 1.803 7927.0 !5 member ring TS ; CBS-QB3 500-2000K k inf!
duplicate
B3=C5H8 1.45E+07 1.643 7530.0 !3 member ring TS ; CBS-QB3 300-2000K k inf!
duplicate
B3=C5H8-12 1.50E+05 2.001 22542.0 !CBS-QB3 500-2000K k inf!
!
! DMF ring opening scheme
!
M1=B2 7.88E+13 0.489 82727.0 !CBS-QB3 500-2000K k inf!
B2=M3 2.82E+12 0.049 1610.0 !CBS-QB3 500-2000K k inf!
B2=M5 3.20E+09 1.006 9294.0 !CBS-QB3 500-2000K k inf!
B2=M6 1.35E+09 0.892 1230.0 !CBS-QB3 500-2000K k inf!
```



```
M6=>C6H6-12+H2O      2.41E+08  1.523  75786.0 !CBS-QB3 500-2000K k inf!  
!M6-RY+R1H=M6      2.00E+13  0.000  0.0 ! literature review  
M6=>C6H6-12+R2OH+R1H    3.61E+14  0.000  81632.2 !from reverse reaction  
M3=M2      9.60E+08  1.157  41665.0 !CBS-QB3 500-2000K k inf!  
M5=M7      4.55E+11  -0.135  20545.0 !CBS-QB3 500-2000K k inf!  
!R14CH3CO+nC4H5=M5    2.00E+13  0.000  0.0 ! Litterature review  
M5=>R14CH3CO+nC4H5    7.44E+16  0.000  86909.9 !from reverse reaction  
!  
!*****!  
! M4 decomposition submech !  
!*****!  
!  
! initial bond fission  
!  
!R14CH3CO+C4H5-1s=M4  2.00E+13  0.000  0.00 ! Litterature review  
M4=>R14CH3CO+C4H4+R1H  5.88E+16  0.000  70357.7 !reverse fitted  
!  
! Pericyclic reactions  
!  
M4=>CH2COZ+C4H6-12    9.25E+08  1.218  77070.0 !CBS-QB3 500-2000K - kinf!  
M4=>C5H8-23+B2CO      3.05E+10  0.785  89076.0 !CBS-QB3 500-2000K - kinf!  
M4=>CH3CH3CHCCH+B2CO    6.63E+09  0.762  77547.0 !CBS-QB3 500-2000K - kinf!  
M4=>CH2COZ+C4H6-1    5.42E+07  1.772  65550.0 !CBS-QB3 500-2000K - kinf!  
!  
!*****!  
! M2 decomposition submech !  
!*****!  
!  
M2=CA4      7.89E+10  0.794  82894.0 !CBS-QB3 500-2000K - kinf!  
CA4=>CH3CHCO+pC3H4    1.87E+14  0.156  32181.0 !CBS-QB3 500-2000K - kinf!  
CA4=M11     1.04E+12  0.254  7553.0 !CBS-QB3 500-2000K - kinf!  
M2=CA3      3.82E+11  0.613  69588.0 !CBS-QB3 500-2000K - kinf!  
CA3=M9      7.69E+12  0.014  323.0 !CBS-QB3 500-2000K - kinf!  
M9=>C5H8-2+B2CO      4.44E+08  1.229  37544.0 !CBS-QB3 500-2000K - kinf!  
!C5H7-2s+R5CHO=M9    2.00E+13  0.000  0.0 !Litterature review  
M9=>C5H7-2s+R5CHO    6.19E+16  0.000  68633.4 !reverse fitted  
!M2-R1+R1H=M2      6.55E+13  0.070  -51.5 !Harding et al.  
M2=>M2-R1+R1H      2.41E+15  0.070  86098.7 !reverse from combination  
!M2-R2+R1H=M2      6.55E+13  0.070  -51.5 !Harding et al.  
M2=>M2-R2+R1H      1.49E+15  0.070  90063.3 !reverse from combination  
M2=M10      9.74E+13  0.304  82685.0 !Analogy with M1=M3, from AEQS on B2 (see  
manuscript)  
M2=M8      1.10e+11  1.261  90368.8 !Analogy with M1=M5, from AEQS on B2 (see  
manuscript)  
M10=M11     9.60E+08  1.157  41665.0 ! from M3=M2  
EnD
```
